1 **T cell response to intact SARS-CoV-2 includes coronavirus cross-reactive and variant-specific**  
2 **components**

3

4 Lichen Jing <sup>1,\*</sup>

5 Xia Wu <sup>1,\*</sup>

6 Maxwell P. Krist <sup>1,\*</sup>

7 Tien-Ying Hsiang <sup>2</sup>

8 Victoria L. Campbell <sup>1</sup>

9 Christopher L. McClurkan <sup>1</sup>

10 Sydney M. Favors <sup>1</sup>

11 Lawrence A. Hemingway <sup>1</sup>

12 Charmie Godornes <sup>1</sup>

13 Denise Q. Tong <sup>1</sup>

14 Stacy Selke <sup>3</sup>

15 Angela C. LeClair <sup>1</sup>

16 Chu-Woo Pyo <sup>7</sup>

17 Daniel E. Geraghty <sup>7</sup>

18 Kerry J. Laing <sup>1</sup>

19 Anna Wald <sup>1,3,6,8</sup>

20 Michael Gale Jr. <sup>2,4,5</sup>

21 David M. Koelle <sup>1,3,5,8,9,10</sup>

22

23 \* Contributed equally

24 <sup>1</sup> Department of Medicine, University of Washington

25 <sup>2</sup> Department of Immunology, University of Washington

26 <sup>3</sup> Department of Laboratory Medicine and Pathology, University of Washington

27 <sup>4</sup> Center for Innate Immunity of Immune Disease, Department of Immunology, University of  
28 Washington

29 <sup>5</sup> Department of Global Health, University of Washington

30 <sup>6</sup> Department of Epidemiology, University of Washington

31 <sup>7</sup> Clinical Research Division, Fred Hutchinson Cancer Research Center

32 <sup>8</sup> Vaccine and Infectious Diseases Division, Fred Hutchinson Cancer Research Center

33 <sup>9</sup> Benaroya Research Institute, Seattle

34

35 <sup>10</sup> Correspondence: David Koelle, 750 Republican Street, Room E651, Seattle, WA, 98109, 206

36 616 1940, [dkoelle@medicine.washington.edu](mailto:dkoelle@medicine.washington.edu)

37

38

39 **Funding**

40 NIH contract HHSN75N93019C00063 (DMK) and HHSN272201600027C (DEG), and NIH  
41 grants AI163999 (DMK, XW), and AI118916, AI104002, and AI115296 (MG).

42

43 **Acknowledgements**

44

45 We thank the participants, the University of Washington Virology Research Clinic and  
46 Immunology Cell Analysis Facility, the Flow Core at Seattle Children's Research Institute, Jesse  
47 Bloom, Katharine Crawford, Keara Malone, Andrea Loes, and Allison Greaney for SARS-CoV-2  
48 plasmids, Ralph Baric for Vero-E6-USAMRIID cells and SARS-CoV-2-strain WA1-GFP, and  
49 Thomas Snyder and Adaptive Biotechnologies for Immunoseq™ sequencing.

50

51 **Author Contributions**

52

53 Conceptualization: DMK, LJ, XW; Data curation and bioinformatic analysis: XW, LJ, MPK, DMK;  
54 Funding acquisition: MG, DEG, DMK; Investigation: LJ, XW, MPK, VLC, T-YH, CLM, C-WP,  
55 SMF, LH, CG, DT, KJL, DG; Data management: SS; Clinical protocol: AW, ACL; Supervision:  
56 DMK, MG; Writing: DMK, XW, MPK, LJ, KL.

57

58 **Abstract**

59

60 SARS-CoV-2 provokes a brisk T cell response. Peptide-based studies exclude antigen  
61 processing and presentation biology and may influence T cell detection studies. To focus on  
62 responses to whole virus and complex antigens, we used intact SARS-CoV-2 and full-length  
63 proteins with DC to activate CD8 and CD4 T cells from convalescent persons. T cell receptor  
64 (TCR) sequencing showed partial repertoire preservation after expansion. Resultant CD8 T cells  
65 recognize SARS-CoV-2-infected respiratory cells, and CD4 T cells detect inactivated whole viral  
66 antigen. Specificity scans with proteome-covering protein/peptide arrays show that CD8 T cells  
67 are oligospecific per subject and that CD4 T cell breadth is higher. Some CD4 T cell lines  
68 enriched using SARS-CoV-2 cross-recognize whole seasonal coronavirus (sCoV) antigens, with  
69 protein, peptide, and HLA restriction validation. Conversely, recognition of some epitopes is  
70 eliminated for SARS-CoV-2 variants, including spike (S) epitopes in the alpha, beta, gamma,  
71 and delta variant lineages.

72

73 **Introduction**

74

75 The acquired immune response to SARS-CoV-2 can limit infection, as shown by protection from  
76 re-infection (1) and the efficacy of vaccines (2). While antibodies can prevent infection and  
77 disease, T cell depletion studies of convalescent or vaccinated animals strongly suggest active  
78 roles for T cells (3). Many studies have defined regions of the predicted SARS-CoV-2 proteome  
79 that can activate T cells in blood (4, 5). This work typically uses single or pooled peptides, or  
80 peptide-based reagents such as HLA multimers. Some workflows result in cell death that limit  
81 follow-up, while others, such as activation-induced marker (AIM)-based cell sorting (6) allow  
82 recovery of live cells for downstream work. Taken together, peptide-based studies provide a  
83 large thesaurus of reactive peptides, and in some cases, relevant HLA restricting alleles and  
84 TCR sequences. However, validation of reactivity with whole virus or complex antigens is less  
85 frequently reported.

86

87 The present report used PBMC from a cohort of coronavirus-19 (COVID-19) convalescent  
88 persons (7-10) to begin to study T-cell responses to SARS-CoV-2 in the contexts of direct- and  
89 cross-presentation of complex viral antigens. Validation with proteome-covering full-length  
90 protein and peptide sets allowed definition and confirmation of many individual epitopes.

91 Expanded responder cell populations also permit detailed study of HLA restriction, functional  
92 avidity, cross-recognition of sCoV, and recognition of circulating SARS-CoV-2 variants including  
93 variants being monitored (VBM) and variants of concern (VOC).

94

95 Estimates of the overall magnitude of the CD4 and CD8 T cell response to SARS-CoV-2, as a  
96 percent of circulating PBMC at times soon after clinical recovery are around the 0.5-1% level  
97 based on the summation of peptide reactivities (4, 11, 12). We were interested in benchmarking  
98 peptide-based estimates for SARS-CoV-2 to the levels of reactivity to whole viral antigen, and in

99 comparing epitope specificities determined using peptide sets and more complex antigens. It is  
100 well established that T cell clonotypes show cross-reactivity to unrelated peptide epitopes  
101 presented by a single HLA allele, for example cross-recognition of disparate influenza and EBV  
102 peptides with HLA A\*02:01 (13), pathogenic cross-recognition of influenza and self-epitopes  
103 (14), and potentially beneficial cross-reactivity between viruses and tumor antigens (15). The  
104 same TCR can also recognize peptides presented by divergent HLA alleles, for example the  
105 alloreactivity of herpes simplex virus (HSV)- or EBV-specific T cells against HLA-mismatched  
106 antigen presenting cells (APC) bearing endogenous peptides (16, 17). Reactivities detected  
107 solely using SARS-CoV-2 peptide sets could include such cross-reactivity. The use of complex  
108 SARS-CoV-2 antigens to enrich responses also incorporates antigen processing and  
109 presentation steps, such as proteosomal cleavage, peptide transport into the endoplasmic  
110 reticulum and trimming during HLA loading, that can be influenced by flanking sequences within  
111 proteins, as well as potentially incorporating post-translational modifications and cryptic ORFs  
112 absent from peptide sets (18, 19). We also studied recognition of whole SARS-CoV-2 at the  
113 effector stage: CD8 T cell assays used infected bronchial epithelial cells HLA-matched to CD8  
114 effector T cells, while CD4 T cell readouts used SARS-CoV-2 antigen and appropriate APC.  
115 Importantly, we also checked if T cells enriched using simpler peptide or protein antigens could  
116 recognize whole virus.

117  
118 SARS-CoV-2 shares genomic structure and sequence motifs with sCoV. Cross-reactivity with  
119 sCoV has been described (20) but is less studied in the whole virus context. SARS-CoV-2 also  
120 shows modest sequence variation, and variants and deletions emerge within-subject in immune  
121 suppressed persons (21), and within populations (22). In the present report, we use culture-  
122 amplified T cell responders to probe recognition of sCoV and variant SARS-CoV-2 T cell  
123 epitopes.

124

125 **Results**

126

127 **Subjects and specimens.** We studied 26 specimens from 12 subjects (Supplementary Table  
128 1) with COVID-19 in March or April 2020, prior to detection of VOCs in the study region (23).  
129 Each subject reported SARS-CoV-2 RNA detection, positive serum or plasma anti-S domain 1  
130 and anti-N IgG, and SARS-CoV-2 neutralizing antibody (nAb) titer  $\geq 1:40$  (7). Median age was  
131 56 (range 32 to 72) and sex was balanced. Amongst 4 hospitalized subjects, 3 required  
132 intensive care. Median illness duration was 16 days (range 4 to 32). PBMC were obtained a  
133 median of 138 days after recovery (range 31 to 256). We used several methods to enrich  
134 SARS-CoV-2-specific T cells for detailed studies (outlined in Supplementary Fig. 1).

135

136 **PBMC T cell responses to whole SARS-CoV-2 antigen.** SARS-CoV-2 WA1 antigen was  
137 prepared from infected cells, rather than from purified virions, to include non-structural proteins  
138 (NSPs) (24). We used dual expression of CD137 and CD69 for analytic AIM and to sort cells for  
139 expansion (Fig. 1) (25). We observed a median of 0.16% (range 0.089% to 0.33%) of CD4 T  
140 cells were AIM (+) (n=5, Supplementary Table 2). Responses to mock antigen were low  
141 (median 0.026%, range 0.009%-0.061%). Responses to viral antigen were higher than to mock  
142 antigen ( $p = 0.0078$  by pair-wise analysis); the median net response was 0.13%. Absolute and  
143 net responses to whole SARS-CoV-2 antigen in HD PBMC were low, with no significant net  
144 virus-specific signal (Supplementary Fig. 2B). We sorted a median of 389 AIM (+) CD4 T cells  
145 (machine counts, range 375 - 2,138) per specimen from the 5 COVID-19 convalescent subjects  
146 (Supplementary Table 2).

147

148 After expansion with a generalized mitogenesis protocol, T cell line (TCL) functional enrichment  
149 was measured as reactivity to whole killed SARS-CoV-2. Autologous PBMC used as APC were  
150 dump-gated and IFN- $\gamma$  and IL-2 expression used to enumerate SARS-CoV-2-specific CD4 T



151 cells (8, 11). We observed robust TCL enrichment of virus-reactive CD4 T cells. For example,  
152 participant W003 TCL had net 8.14% of cells responding to whole SARS-CoV-2 (Fig. 1C), a 61-  
153 fold enrichment over the PBMC CD4 T cell AIM signal. Enrichment ranged from 41- to 201-fold  
154 for the 5 subjects (Supplementary Table 2).

155  
156 Both monocytes in fresh PBMC and moDC can process and present antigens to CD4 T cells.  
157 Higher levels of PBMC CD4 T cell activation were noted when autologous DC were used as  
158 initial APC (Fig. 1B) compared to direct addition of killed virus to PBMC. Background signal for  
159 mock antigen also slightly increased (median 0.16%, range 0.11%-0.47%). The median net  
160 proportion of AIM (+) CD4 T cells was 0.66% (range 0.35% to 2.43%) across 12 samples. Use  
161 of moDC allowed the sorting of a median of 11,320 activated CD4 T cells per specimen (range  
162 8,190 to 19,860), from which 20% were culture-expanded (Supplementary Table 2) and 80%  
163 used for *ex vivo* TCR sequencing.

164  
165 In addition to presentation to CD4 T cells, moDC can cross-present inactivated antigen to CD8  
166 T cells. Using moDC, we observed specific CD8 T cell activation as measured by CD69 and  
167 CD137 co-expression (Fig. 1B). Negative control antigen was immunologically silent. We did not  
168 detect PBMC CD8 T cell responses in HD (Supplementary Fig. 2). As with CD4 T cells, higher  
169 net proportions of AIM (+) CD8 T cells were noted with moDC (n = 12, median 0.95%, range  
170 0.27 to 1.62%) than without (n = 5, median 0.033%, range 0.013%-0.29%) (Supplementary Fig.  
171 2B, Supplementary Table 2). A median of 842 CD8 T cells (range, 411 - 2,611) were expanded  
172 per specimen, while 80% of the AIM-sorted cell populations were TCR-sequenced.

173  
174 Two subjects were studied using moDC at five time points each between 32 to 256 days after  
175 recovery from COVID-19. Decreasing CD4 and CD8 AIM (+) abundance was noted over time  
176 (Supplementary Table 2). Subject W005 had consistently higher CD4 than CD8 T cell

177 responses, with the ratio of activated cells ranging from 1.54 to 3.15. A reciprocal pattern was  
178 seen in subject W012, with consistent CD4/CD8 ratios of AIM (+) cells < 1.

179

180 **TCR repertoire tracking during T cell expansion.** We used the moDC workflow to present  
181 whole SARS-CoV-2 antigen (above), and analyzed AIM (+) CD4 and CD8 T cells from three  
182 subjects at two time points each. A portion of AIM (+) cells were directly sequenced, and a  
183 portion sequenced after expansion, with a genomic DNA-based method (26). A median of  
184 6.75% of CDR3 aa sequences detected *ex vivo* were found in expanded cultures. Reciprocally,  
185 a median of 16.75% of productive CDR3 aa sequences in the expanded cultures were detected  
186 in the corresponding *ex vivo* samples (representative data, Supplementary Fig. 3A). CDR3  
187 abundances showed excellent agreement for AIM (+) cells after one vs two expansions  
188 (representative data, Supplementary Fig. 3B). A possible factor contributing to repertoire  
189 differences *ex vivo* vs. post-expansion is poor recovery of DNA from small *ex vivo* specimens.  
190 Amongst the 12 *ex vivo* samples, the median number of productive CDR3 gene rearrangements  
191 reported was 11.6% (range, 4.9-21.7%) of the sorting cell counts.

192

193 **Alternative generation of polyclonal SARS-CoV-2-reactive T cells.** As an alternative  
194 approach to retains an antigen processing requirement, SARS-CoV-2 proteins were expressed  
195 in COS-7 or HeLa cells. These were harvested, inactivated, and added to PBMC without (COS-  
196 7) or with (HeLa) autologous moDC. Small increments in AIM-positive CD4 or CD8 T cells were  
197 detectable compared to mock antigen (representative data, Supplementary Fig. 4A). Finally,  
198 CD8 or CD4 T cells proliferating (representative data, Supplementary Fig. 5A) to SARS-CoV-2  
199 peptide pools were sorted and expanded.

200

201 **CD8 T cell recognition of infected cells.** CD8 T cell recognition typically requires HLA  
202 matching. HBEC3-KT-A are permissive for SARS-CoV-2 replication and are HLA A\*03:01 (+)

203 (Supplementary Table 3). For effector CD8 T cells we stimulated PBMC from HLA A\*03:01 (+)  
204 participant W003 with autologous DC loaded with S protein-expressing HeLa cells, sorted AIM  
205 (+) CD8 T cells, expanded them, and showed they recognized S protein in the HLA A\*03:01  
206 context (Supplementary Fig. 6A). A reactive peptide, S 377-389, was found using peptide  
207 matrices (Supplementary Fig. 6B) containing the HLA A\*03:01-restricted epitope S 378-386  
208 (27). A fluorescent A\*03:01-S 378-386 tetramer allowed further enrichment of CD8 T cells  
209 (Supplementary Fig. 6C). We then examined if S protein could be processed and presented by  
210 virus-infected cells. CD8 T cells specifically recognized SARS-CoV-2-infected HBEC3-KT-A  
211 cells (Fig. 2A). Specificity control HLA A\*03:01-restricted, tetramer-enriched CD8 T cells,  
212 specific for an unrelated polyomavirus epitope in MCPyV (28), were active when tested with  
213 polyomavirus peptide-pulsed HBEC3-KT-A positive controls (Fig. 2B) but did not recognize  
214 SARS-CoV-2-infected target cells (Fig. 2A).

215  
216 **CD8 T cell responses to full-length SARS-CoV-2 proteins.** CD8 T cell target diversity was  
217 studied using whole virus stimulation followed by SARS-CoV-2 proteome-wide scans using  
218 subject-specific HLA A and B aAPC panels. A complex response was observed for subject  
219 W005, hospitalized in the ICU and studied 32 days after recovery, by incorporating DC boosting.  
220 This subject had an HLA B\*15:02-restricted response to NSP2, HLA A\*11:01- and B\*15:02-  
221 restricted responses to nucleoprotein, and an HLA B\*51:01-restricted response to ORF3A (Fig.  
222 3A). Multiple proteins were positive for subject W012, while subject W001, studied using moDC,  
223 only showed responses to ORF9B (summarized in Fig. 4A). Even when moDC were not used,  
224 the aAPC-proteome panels were successful for bulk AIM-enriched CD8 TCL enriched with  
225 whole virus. For example, subject W010 had a single HLA A\*01:01-restricted response detected  
226 for NSP3 (Fig. 3B). This was confirmed at the peptide level (Fig. 3C), allowing tetramer  
227 enrichment (Fig. 3D) and use of tetramer-enriched cells confirmed as ORF- and peptide-  
228 reactive (Fig. 3E) to determine functional avidity (Fig. 3F).

229

230 **CD4 T cell responses to full-length SARS-CoV-2 proteins.** AIM-sorted, expanded CD4 TCL,  
231 enriched with or without DC boosting, were similarly tested proteome-wide. Each SARS-CoV-2  
232 ORF or cleaved polypeptide product of ORFs polypeptide (PP)1a and PP1ab(29) was  
233 expressed (30). Readout assays included Th1 cytokine ICS (supplementary Fig. 7A),  
234 proliferation (supplementary Fig. 7B), and IFN- $\gamma$  secretion (supplementary Fig. 7C). Across 17  
235 specimens from 8 persons, a median of 7 proteins were recognized per specimen (range, 3 to  
236 15) (summarized in Fig. 4B). The SARS-CoV-2 proteins recognized in the highest percentage of  
237 participants were S, membrane (M), nucleoprotein (N), and ORF9B (Fig. 4B). Reactivity to  
238 ORF3A, ORF7A, NSP2, and NSP3 were also noted in 50% or more of participants. Because  
239 DC were not used for all specimens and few participants were studied, conclusions about  
240 antigen breadth and dominance remain preliminary. We noted that over time, most within-  
241 participant protein-level responses were consistent. For example, participant W005 recognized  
242 NSP2, NSP13, and NSP16 at almost all time points (Fig. 4B).

243

244 **CD8 T cell epitopes.** TCL initiated with diverse workflows (Supplementary Fig. 1) were used.  
245 moDC-whole virus stimulation of PBMC yielded peptide epitopes (examples, Supplementary  
246 Fig. 8) to confirm ORF-level hits (Fig. 3A, Fig. 4A). PBMC stimulation with SARS-CoV-2 proteins  
247 with DC, followed by AIM sorting also yielded cultures that reacted with the relevant ORF and  
248 discrete peptides (example, Supplementary Fig. 4A, 4B), as did PBMC stimulation with pooled  
249 peptides followed by sorting of proliferated cells (Supplementary Fig. 5A, Supplementary Fig.  
250 4C). Overall, integrated across CD8 TCL and eliminating redundancies, CD8 T cells reactive  
251 with 25 SARS-CoV-2 epitopes in the context of 8 HLA class I alleles were obtained  
252 (Supplementary Table 4).

253

254 **CD4 T cell epitopes.** TCL initiated with several workflows were tested to define peptide  
255 epitopes. Importantly, when TCL were started with peptide pools (as in Supplementary Fig. 5A),  
256 the resultant TCL recognized whole virus lysate and full-length protein (Supplementary Fig. 5B)  
257 as well as peptides (Supplementary Fig. 5C), suggesting epitopes discovered with peptides are  
258 relevant to viral infection. IFN- $\gamma$  and proliferation readouts corresponded (representative data,  
259 Supplementary Fig. 9) and we summarize epitopes defined with either or both readouts.  
260 Cultures initiated with complex antigen, such as from participant W001 using moDC-assisted  
261 stimulation with whole virus, yielded multiple reactive peptides (representative data,  
262 Supplementary Fig. 10). Overall, CD4 T cell epitopes were detected in 13 SARS-CoV-2  
263 proteins. Responses were diverse within-person. For specimen 1 from participant W001  
264 (Supplementary Table 1), 55 epitopes were confirmed in 7 proteins, including 27 epitopes in S,  
265 7 each in N and NSP3, 6 in ORF3A, 5 in M, 2 in ORF9B, and 1 in ORF7A (Supplementary  
266 Table 5). Similarly, in participant W005 studied one month after recovery, 65 CD4 T cell  
267 epitopes were identified in 10 proteins. Altogether, we observed 240 CD4 T cell peptide  
268 reactivities from 8 persons (Supplementary Table 5). These correspond to 172 unique SARS-  
269 CoV-2 peptides (Supplementary Table 5). Amongst these, we found 70 epitopes in S protein, 26  
270 in N protein, and 23 in M protein, with fewer in ORFs 3A, 7A, 8, and 9, and NSPs 1, 2, 3, 4, 6,  
271 and 7. Peptides with CD4 T cell recognition by at least half the population studied included M  
272 69-81, M 177-189, S aa 133-145, S 165-177, N 289-301, and N 349-361.

273

274 **CD4 T cell HLA restriction and functional avidity.** Studies of CD4 T cell HLA restriction and  
275 estimated functional avidity (representative data, Supplementary Fig. 11) yielded HLA locus-  
276 level data on 118 of 123 (96%) peptides tested. Amongst these, 84 (72%) were HLA DR-  
277 restricted, 23 (20%) were HLA DQ-restricted, and 11 (8%) were HLA DP-restricted  
278 (Supplementary Table 5). HLA restriction at the locus level was generally identical if two  
279 participants recognized the same peptide, but there were exceptions. S protein aa 165-177 was

280 HLA DP-restricted in 4 participants and HLA DR-restricted in 2. Allele-level restriction was  
281 determined using aAPC (representative data, Supplementary Fig. 11A, 11B). We observed  
282 presentation by 10 distinct HLA DRB1, DRB3, and DRB4 alleles (Supplementary Table 5).  
283 Some peptides in SARS-CoV-2 S, M, and N proteins were presented by both DRB1 and either  
284 DRB3 or DRB4 (representative data, Supplementary Fig. 11C) or dual DRB3 alleles (not  
285 shown). Functional avidity data were available for 124 CD4 T cell epitopes (representative data,  
286 Supplementary Fig. 11, summarized in Supplemental Table 5). Responses at 1 and 10 ng/ml  
287 peptide were noted for 4 and 10 epitopes, respectively. S 165-177 was particularly potent, with  
288 responses at 1 or 10 ng/ml for 5 of 6 subjects.

289

290 **Recognition of seasonal coronaviruses.** Cross-recognition of SARS-CoV-2 and sCoV  
291 peptide has been documented (6, 20), but less is known about recognition of complex viral  
292 antigens. We found that polyclonal CD4 TCL each of three subjects studied, enriched from  
293 PBMC using whole SARS-CoV-2 antigen and moDC, cross-recognized either whole OC43 or  
294 whole 229E cell-associated virus (Fig. 5A). Control mock-infected virus preparations were  
295 negative. An additional CD4 TCL enriched using whole SARS-CoV-2 antigen without moDC  
296 also cross-recognized OC43. For subject W001, S proteins from both viruses were both  
297 antigenic (Fig. 5B), as were both homologs of a peptide in S. The HLA restricting allele was  
298 established as HLA DRB1\*15:01 (Fig. 5C). Cross-recognition of an HLA DP-restricted peptide  
299 that is nearly identical in SARS-CoV-2, OC43, and HKU1 N proteins was also observed  
300 (Supplementary Fig. 12).

301

302 **Recognition of SARS-CoV-2 variants.** To choose variants for study we correlated SARS-  
303 CoV-2 T cell epitopes detected using Wu-1/WA1 reagents with variants both in early 2020 data  
304 and in early 2021 VBM, concentrating on the B.1.1.7, B.1.351, and P1 lineages. Polyclonal CD8  
305 TCL were recovered from subject W004 using an S peptide pool (Supplementary Fig. 5A).

306 Potent recognition of strain Wu-1 peptides 269-277 YLQ and 417-425 KIA, HLA A\*02:01-  
307 restricted epitopes (27), was observed (Fig. 6). There was no recognition of variants with  
308 substitutions K417N and K417T which are present in the B.1.351 and P.1 lineages, respectively.  
309 Epitope-specific T cells enriched with tetramers (Supplementary Fig. 13A) detected full-length S  
310 processed by HLA A\*02:01-transfected aAPC (Supplementary Fig. 13B), but failed to recognize  
311 S K417T or the full-length SARS-CoV-2 S variant from lineage B.1.351 bearing K417T.  
312 Responses to S from B.1.1.7, which does not have an aa417 substitution, were intact. Control  
313 CD8 T cells specific for S aa 269-277 YLQ, unchanged in these variants, were not affected  
314 (Supplementary Fig. 13B). We also observed loss of CD8 TCL reactivity to SARS-CoV-2 S  
315 F490S in the HLA A\*29:02-restricted aa 489-497 epitope, to S K378N in the HLA A\*03:01-  
316 restricted aa 378-386 epitope, and to M (membrane) T175M in the HLA A\*11:01 aa 169-181  
317 epitope (Supplementary Fig. 13, summarized in Table 1).  
318  
319 Variant changes could also influence CD4 T cell recognition (primary data, Supplementary Figs.  
320 14-17). In addition to loss of recognition of variant aa in B.1.1.7 (effects summarized in Table 1  
321 and Fig. 7) and/or P.1 lineages, we also noted strain-specific recognition of B.1.1.7-associated  
322 sequences that were already prevalent in early 2020 and not unique to VBM (example,  
323 Supplementary Fig. 10, indicated in blue). A graphical summary of variants evaluated in S (Fig.  
324 7) shows a mixture of responses that are either preserved, partially reduced in dose-response  
325 assays, or abrogated when tested with variant peptides.



326 **Discussion**

327

328 The T cell response to SARS-CoV-2 is functionally important (31). Studies have correlated T  
329 cell kinetics, magnitude or phenotypes with disease in apparently immune competent persons  
330 with delayed or dis-coordinated immunity and poor clinical outcome (8, 32). T cell responses  
331 have been linked to protection from re-infection (33). Disease states and iatrogenic treatments  
332 that decrease T cell responses can prolong live virus shedding (34, 35). Cooperation between T  
333 and B cells, such as antigen-specific CD4 T<sub>FH</sub> (36), also suggest that T cells are involved in  
334 pathogen control. Supporting this, S-specific CD4 T cell TCR breadth and depth correlate with  
335 nAb titers in COVID-19 convalescent persons (9). CD8 T cell depletion data in non-human  
336 primates indicate that these effectors contribute to vaccine-induced protection (3).

337

338 Many groups have detected responses to SARS-CoV-2 epitopes using peptide-based  
339 technologies (31), but less work has focused on T cell reactivity to complex antigens such as  
340 whole virus or full-length proteins. Both T cell priming, and effector responses of memory T  
341 cells, occur *in vivo* in the context of viral infection and/or loading of antigen into various APC,  
342 with important differences for HLA class I and II (37). In the present report, we leveraged the  
343 ability of moDC to cross-present whole viral antigen to CD8 T cells, and to present viral antigen  
344 to CD4 T cells, to enrich polyclonal SARS-CoV-2-specific T cells. Similar studies are rare; in one  
345 report, live virus induced subtle IFN- $\gamma$  expression in convalescent T cells, but confirmation of  
346 virus specificity was not documented (38). Using established (25, 30, 39-42) readout methods,  
347 TCL created after whole virus or simpler antigen stimulation were used to study the breadth and  
348 specificity of the T cell response, reactivity to virus-infected cells, and recognition of sCoV and  
349 SARS-CoV-2 variants.

350



351 Acute COVID-19 most severely effects the respiratory tract, and while autopsy surveys can  
352 detect virus body-wide (43), it is likely that T cell contributions to host defense and possibly to  
353 inflammatory damage occur mostly in the respiratory tract and draining lymph nodes. Cytotoxic  
354 T cells have the potential to kill SARS-CoV-2 infected cells and thus reduce viral progeny and  
355 further cell infection. To date, reports of the ability of T cells to recognize SARS-CoV-2 infected  
356 cells are limited. We have begun such studies using the HBEC3-KT-A. We previously showed  
357 that HBEC3-KT-A cells are permissive for expression of SARS-CoV-2 ORF6 protein after  
358 infection, (44) and that infected cells stain positively for S protein and viral RNA (45). We find  
359 that HLA-matched S-specific CD8 T cells recognize virally infected cells. HBEC3-KT cells can  
360 differentiate into ciliated and mucus-producing goblet cells *in vitro* (46), and *in vivo*, ciliated  
361 respiratory epithelial cells have the highest levels of SARS-CoV-2 RNA (47). Zhang *et al.* have  
362 reported that the SARS-CoV-2 ORF8 protein can down-regulate HLA class I and limit CD8 T  
363 cell killing of peptide-sensitized target cells (48). Wagner *et al.* have shown recognition of  
364 SARS-CoV-2-infected cancer-origin lung alveolar cells by overexpressing ACE2 and exogenous  
365 HLA class I alleles. Effector cells were allogeneic T cells engineered to express TCRs specific  
366 for SARs-CoV-2 (49). Many viruses encode CD8 T cell evasion functions, effects that can be  
367 selective for non-transformed, physiologically relevant APC (50). We are currently optimizing  
368 SARS-CoV-2 infection of primary human nasal epithelial cells, differentiated to ciliated and  
369 goblet phenotypes, and pursuing CD8 recognition studies of other SARS-CoV-2 proteins, target  
370 cell killing, and reduction of viral yield in CD8 T cell studies.

371

372 A cytotoxic CD4 T cell phenotype has been detected during acute SARS-CoV-2 infection (51,  
373 52). Upper and lower respiratory tract epithelial cells can display HLA class II required for CD4 T  
374 cell recognition, and pulmonary alveolar macrophages are excellent APC for CD4 T cells and  
375 are abundant in COVID-19 pneumonia, containing SARS-CoV-2 antigen (53). Thus, CD4 T cell

376 recognition of whole viral antigen could be relevant to lung infection, again with either salutary or  
377 damaging effects.

378

379 We studied T cell responses from relatively few persons and have not attempted to evaluate  
380 novelty per-epitope given the plethora of work in this area. Coverage of the entire viral  
381 proteome may, however, enable some novel insights. Mass spectroscopy suggests a large  
382 spectrum in SARS-CoV-2 NSP abundance in infected cell cultures (54, 55) and *in vivo* (56, 57).  
383 Previous studies suggesting that viral protein abundance is associated with CD4 T cell  
384 immunodominance (39, 58) are supported by our finding of prevalent and poly-specific  
385 responses to the abundant S and N proteins. The high population prevalence of CD4 responses  
386 to M, NSP3 and ORF3A also agree with prior work (31). We also found responses to NSP2 and  
387 ORF9B in at least half the subjects studied proteome-wide. NSP2 has previously been  
388 described as a CD4 immunogen in convalescent persons, while ORF9B was not included in  
389 some previous surveys (4, 11, 59-62). ORF9B is an alternative open reading frame within the  
390 nucleoprotein locus encoding a 98 aa-long ORF9B protein that is abundant in infected cells  
391 (54), localizes to mitochondria (63), elicits strong antibody responses (64), and is involved in  
392 evasion of type I IFN responses (65). CD4 T cell breadth was studied in 17 samples from 8  
393 persons. We found a median CD4 breadth of 7 viral antigens/specimen, and that 6 of 8 persons  
394 recognized 7 or more proteins. In contrast, a survey of 99 convalescent persons with proteome-  
395 wide peptides and an *ex vivo* AIM approach found an average of 3.2 CD4 T cell antigenic  
396 proteins per person with no subject recognizing over 6 proteins (4).

397

398 TCL allowed tests of a large number of SARS-CoV-2 variant peptides. We found many  
399 examples of abrogation or reduction of recognition of variants, some from variants of concern.  
400 The literature consensus is that T cell responses to infection or vaccination are poly-specific,  
401 such that failed variant epitope recognition may not have a net deleterious effect on immunity

402 (31). However, detailed investigations remain warranted. Tarke *et al.* tested PBMC from  
403 convalescent persons infected early in the pandemic (66). While *ex vivo* T cell responses in  
404 convalescent PBMC measured by AIM did not differ between ancestral- and variant-derived  
405 peptide pools for CD4 or CD8 T cells, IFN- $\gamma$  ELISPOT detected decreased overall for VOC  
406 compared to Wu-1 peptides. Agerer *et al.* focused the HLA A\*02:01-restricted response to the S  
407 aa 269-277 YLQ epitope (67). The L270F variant showed decreased binding to HLA A\*02:01  
408 and no activation of YLQ-specific CD8 T cells. L270F has been detected in 3 of > 1.4 million  
409 global sequences. In contrast, the P272L variant we investigated has been noted over 9000  
410 times. aa 272 is modeled to face TCR (68) and to not reduce HLA A\*02:01 binding. Based on  
411 structural models (68) and other epitope variants (69, 70), the S P272L (epitope position 4) and  
412 K417N or K417T (epitope position 1) variants studied herein could generate variant-specific T  
413 cells, a hypothesis testable in convalescent PBMC. Recently, de Silva *et al.* documented  
414 additional examples of strain-specific CD8 T cell recognition of SARS-CoV-2 variants (71).  
415 COVID-19 vaccines mostly use Wu-1-like S antigen, such that vaccinee T cells may also detect  
416 variant-specific T cell recognition. Recently, Keeton *et al.* detected modest differences in CD8 T  
417 cell recognition of S between vaccine strain and delta variant peptides (72). In another vaccine  
418 study (66), AIM responses to the B.1.351 S pool were lower for CD4 and CD8 T-cells compared  
419 to Wu-1 peptides. The precise epitope and HLA restriction information in this report can focus  
420 studies of variant recognition in cases of breakthrough infection as the pandemic continues to  
421 evolve, and as epitope-based (NCT04776317) and variant-based vaccines (73) are studied in  
422 clinical trials.

423  
424 The present report also adds to the growing body of literature concerning cross-recognition of  
425 sCoV and SARS-CoV-2 (20, 27, 74-76). The use of whole viral antigens in both stimulation and  
426 readout stages of our investigations of sCoV allowed us to document that polyclonal CD4 TCL  
427 from COVID-19 convalescent persons can recognize whole OC43 and 229E viral antigen. As

428 mentioned above, this assay format integrates antigen processing and presentation to  
429 supplement studies that focus solely on peptide reactivity. Validation to the antigen, peptide,  
430 and HLA restriction level was obtained for an epitope in OC43 S. The presence and sequencing  
431 of SARS-CoV-2 and sCoV infections in our study population are unknown. However, the timing  
432 of our specimen collection shortly after recovery from COVID-19, and sero-epidemiologic data  
433 that most adults have been infected with multiple sCoV, suggest the T cell cross-reactivities we  
434 detected may reflect prior sCoV infections boosted by SARS-CoV-2, Data concerning sCoV T  
435 cell cross-reactivity can be integrated with antibody-based (77, 78) and clinical studies (79) to  
436 determine if sCoV-specific immune memory modulate COVID-19 disease, and to guide  
437 development of possible pan-coronavirus vaccines.

438

439 The current study has limitations. We observed no AIM response to whole SARS-CoV-2 in HD,  
440 yet, several groups have documented the presence of SARS-CoV-2-reactive T cells in  
441 uninfected individuals from either the naïve or sCoV-primed memory repertoires (20, 80). Our  
442 approaches may be better suited to memory response to SARS-CoV-2 infection itself but could  
443 be adapted to capture these responses, for example by using higher input cell numbers. We  
444 noted only moderate preservation of TCR sequences comparing *ex vivo* sorted AIM (+) T cells  
445 and expanded cultures. Biological factors related to TCR repertoire differences could include  
446 rare clonotypes that assorted into either the *ex vivo* TCRseq or expansion fractions of the AIM  
447 (+) cells, rather than being represented in both. Indeed, sequencing of AIM (+) cells *ex vivo*  
448 shows broad and diverse responses at the TCR sequence level even to single epitopes, with  
449 many clonotypes detected at low levels (81). T cell programming could render some T cells  
450 refractory to expansion, with an exhausted T cell phenotype noted for SARS-CoV-2-specific  
451 memory T cells in some settings (82). Technical factors could also contribute, ranging from DNA  
452 extraction or PCR inefficiencies during TCR sequencing protocols to lack of provision of T cell  
453 expansion culture conditions required for some of the AIM (+) cells. Analytically, we discounted

454 T cell clonotypes detected at less than two copies, potentially reducing concurrency between *ex*  
455 *vivo* and expanded repertoires. Alternative methods such as single-cell TCRseq (83) to capture  
456 the TCR repertoire AIM (+) cells *ex vivo* can be applied in the future to study the virus-specific  
457 repertoire before and after expansion and to determine if there are transcriptional programs  
458 correlated with failure to expand. In addition, a relatively low number of persons were studied.  
459 The viral antigens used could have low abundance for some viral proteins in our antigen  
460 preparation, leading to underestimation of antigen breadth.

461

462 In conclusion, T cells are a functionally important component of the specific acquired immune  
463 response to SARS-CoV-2 infection and vaccination. We have shown brisk recognition of whole  
464 SARS-CoV-2 by both CD4 and CD8 T cells from convalescent persons, provide estimates of the  
465 integrated frequency of these cells in the circulation, and used proteome-covering tools to  
466 approach within-subject antigenic breadth at the antigen and epitope levels. We found many  
467 examples of loss of recognition of epitope variants by effector T cells recovered from persons  
468 infected early in the pandemic, and used whole viral antigens to document coronavirus cross-  
469 reactive T cell immunity.

470

471 **Methods**

472

473 **Subjects and specimens.** The COVID-19 cohort has been described (7-10). Subjects  
474 reporting SARS-CoV-2 detection and an illness compatible with COVID-19 were recruited.  
475 Subjects were seropositive for serum IgG for SARS-CoV-2 S and nucleoprotein (N) (7)  
476 (Supplementary Table 1). PBMC were cryopreserved in liquid nitrogen. Adult healthy donor  
477 (HD) PBMC were collected before 2019. Subjects provided informed written consent and  
478 studies were Institutional Review Board-approved. HLA typing was by PCR amplicon  
479 sequencing at Scisco Genetics (Seattle, WA).

480

481 **Antigens.** For whole viral antigen, SARS-CoV-2 strain Washington 1 (WA1) (84) (Genbank  
482 MN985325.1) was cultured on Vero-E6 USAMRIID cells (gift of Dr. Ralph Baric, University of  
483 North Carolina, Chapel Hill, NC) at MOI 0.1 for 48 hours to 80% cytopathic effect. Cells were  
484 recovered by scraping and frozen/thawed thrice. Titers ranged from  $4.2 \times 10^7$  to  $4.8 \times 10^8$  pfu/ml  
485 in Vero-E6-USAMRIID plaque assay (85) before inactivation. After UV light ( $900 \text{ mJ/cm}^2$ ) and  
486 three cycles of freeze-thaw, plaque assays were negative on Vero-E6-USAMRIID. Vero mock  
487 antigen was prepared in parallel. Full-length SARS-CoV-2 codon-optimized molecular clones  
488 non-structural protein (NSP)1-NSP10, NSP12-NSP16, S, ORF3A, ORF3B, E, M, N, ORF6,  
489 ORF7A, ORF7B, ORF8, N, ORF9B, ORF9C (also known as ORF9Bwu and ORF14) from  
490 Wuhan-Hu-1 (Wu-1, Genbank NC\_045512.2), and ORF10 from strain HKU-SZ-005b  
491 (Genbank MN975262.1) cloned into pDONR207 or pDONR223 (29) (ThermoFisher, Waltham,  
492 MA), were obtained from Addgene (Watertown, MA). Gateway™ reactions (ThermoFisher)  
493 shuttled inserts to expression vectors pDEST103 and pDEST203 for CD8 and CD4 T cell  
494 research (30). pDEST103 expresses proteins intracellularly as fusions after N-terminal eGFP  
495 driven by a CMV promoter. pDEST203 expresses 6-histidine fusion proteins under the control of  
496 a T7 promoter and is used (30) to express antigens via *in vitro* transcription/translation (IVTT)

497 (Expressway, ThermoFisher). SARS-CoV-2 S Wu-1 with the D614G mutation,  
498 HDM\_Spikedelta21\_D614G (Addgene #158762), and isogenic mutant K417N are described  
499 (86, 87). Additional plasmids were designed per S consensus data (22) (88) concordant with  
500 representative sequences from GISAID (89) (EPI\_ISL\_760400 (B.1.1.7 lineage) and  
501 EPI\_ISL\_700420 (B.1.351 lineage)). These were designed with the same 21 aa C-terminal  
502 deletion as Wu-1 D614G and D614G/K417N and synthesized and cloned by Twist (South San  
503 Francisco, CA) into pHDM to create HDM\_Spikedelta21\_B.1.351 and  
504 HDM\_Spikedelta21\_B.1.1.7 for transient transfection of eukaryotic cells. The predicted  
505 polypeptide sequences of strains WA1 used for PBMC stimulation, Wu-1 used for most peptides  
506 differ at ORF8 aa 84 with an S residue in WA1 and L in Wu-1.

507

508 sCoV OC43 (NR-52725), 229E (NR-52726), and NL63 (NR-470) were obtained from BEI  
509 Resources. OC43 was cultured on VERO E6 AT cells stably transduced with angiotensin  
510 converting enzyme 2 (ACE2) and transmembrane serine protease 2 (gift from Michael S.  
511 Diamond, Washington University, St. Louis, USA), 229E was cultured on Huh7 cells (90) and  
512 NL63 cultured on MK2-LLC cells (CCL-7, ATCC). Antigen was prepared by freeze-thaw and  
513 clarification (400 x g, 10 min, room temperature) of infected cells and UV-inactivated, with mock  
514 uninfected cell antigens prepared in parallel. Viral titers measured in the producer cells prior to  
515 UV were  $1.6 \times 10^5$  TCID<sub>50</sub>/ml (OC43),  $2.3 \times 10^6$  TCID<sub>50</sub>/ml (229E) and  $2.0 \times 10^2$  TCID<sub>50</sub>/ml  
516 (NL63). Antigens were tested at 1:40 (v/v) in T cell assays. S genes from OC43, 229E, NL63  
517 and HKU1 (R619-M89-303, R619-M66-303, R619-M90-303, R619-M91-303; 166014, 166015,  
518 166016, 166017, all Addgene) were subcloned into pDEST203 (91). IVTT-expressed antigens  
519 were tested at 1:1000.

520

521 Peptides covering the SARS-CoV-2 strain Wu-1 predicted proteome, 13 aa long overlapping by  
522 9 aa, were obtained at  $\geq 70\%$  purity (Genscript, Piscataway, NJ) and dissolved at 20 mg/ml in  
523 DMSO (ThermoFisher). Peptides in SARS-CoV-2 ORFs polypeptides PP1a and PP1ab are  
524 numbered by positions in the polypeptide rather than within non-structural proteins (NSPs).  
525 Pools contained  $\leq 54$  peptides, maintaining 1  $\mu\text{g/ml}$  final in-assay concentrations each, and  $\leq$   
526 0.3% DMSO. Selected peptides containing variant aa, peptides shorter than 13 aa predicted to  
527 bind to HLA class I alleles, or peptides internal to antigenic peptides were also studied. Variants  
528 surveyed included variant 501Y.V1 lineage B.1.1.7 (alpha) (92), variant B501Y.V2 lineage  
529 B.1.351 (beta) (22), variant 501Y.V3 P.1 lineage, (gamma) (93), and lineage B.1.617.2, (delta)  
530 (nomenclature per US CDC Oct 2021 [https://www.cdc.gov/coronavirus/2019-](https://www.cdc.gov/coronavirus/2019-ncov/variants/variant-info.html#Interest)  
531 [ncov/variants/variant-info.html#Interest](https://www.cdc.gov/coronavirus/2019-ncov/variants/variant-info.html#Interest)). sCoV homologs for defined SARS-CoV-2 Wu-1  
532 epitopes in S, N, and M proteins were determined by sequence alignment. If  $\geq 1$  sCoV homolog,  
533 amongst OC43, HKU1, 229E, and NL63, had identity at  $\geq 7$  aa with antigenic peptides from  
534 SARS-CoV-2 Wu-1, 13 aa homologs of the antigenic SARS-CoV-2 peptide from all 4 sCoV  
535 were assayed. In addition, OC43 S peptides, 15 aa long/11 aa overlap (EMPS-OC43-S-1, JPT,  
536 Berlin, Germany) were tested as pools or single peptides at 1  $\mu\text{g/ml}$  final in  $\leq 0.4\%$  DMSO.  
537  
538 **SARS-CoV-2-specific T cell enrichment and expansion.** For DC-AIM-based enrichment,  
539 monocytes were enriched (CD14 positive, Stemcell) and cultured in serum-free AIM-V  
540 (Stemcell) with 10 ng/ml each IL-4 and GM-CSF (R&D, Minneapolis, MN) in 6-well plates.  
541 Monocyte-origin DC (moDC) were collected at day 7 with EDTA/scraping, and seeded at  $2.5 \times$   
542  $10^5$ /well in 48-well plates. SARS-CoV-2 antigen was loaded into moDC by adding 25  $\mu\text{l}$  UV-  
543 killed virus or mock antigen in 1 ml T cell medium (TCM). After 4 hours,  $2 \times 10^6$  autologous total  
544 T cells (negative selection, Stemcell) were added for 18 hours. Cells were stained with anti-  
545 CD3-PE (BioLegend, UCHT1), anti-CD4-APC-Cy7 (Becton Dickinson, RPA-T4), anti-CD8-FITC  
546 (ThermoFisher 3B5), anti-CD69-BV421 or PE-Cy7 (BioLegend, FN50), anti-CD137-APC



547 (Becton Dickinson, 4B4-1), and 7-actinomycin D (7-AAD). Live CD3<sup>+</sup>CD4<sup>+</sup>CD8<sup>-</sup> or CD4<sup>-</sup>CD8<sup>+</sup>  
548 cells with CD137 and CD69 expression were bulk-sorted and 20% of sorted cells were non-  
549 specifically expanded for two cycles (94), with 80% saved for TCR sequencing. moDC were  
550 also used to present single viral proteins. HeLa cells (CCL-2, ATCC) were transfected with  
551 SARS-CoV-2 genes cloned into pDEST103, or pDEST103 control, using FuGene 6 (Promega)  
552 and collected at 48 hours. Transfected cells were suspended to  $1 \times 10^6$  cells/ml and UV-C-  
553 treated in a 6-well plate with  $3600 \mu\text{J}/\text{cm}^2$ . moDC were collected at day 7 with EDTA and  $1 \times 10^5$   
554 moDC in 0.4 ml TCM were seeded into 48-well plates for 4 hours prior to adding  $1 \times 10^5$  UV-  
555 treated HeLa for one hour.  $1.5 \times 10^6$  autologous PBMC in 0.1 ml were added at 37°C for 18  
556 hours. AIM sorting was also used after stimulation of PBMC without moDC addition. For whole  
557 virus, UV-inactivated SARS-CoV-2 was incubated at 1:20 to 1:40 dilution with  $1.5 \times 10^6$  PBMC  
558 in 0.2 ml TCM in 96 well U-bottom plates for 18 hours. Mock virus negative control and 1.6  
559  $\mu\text{g}/\text{ml}$  phytohemagglutinin (PHA)-P (Remel, Lenexa, KS) positive control were included. For viral  
560 proteins, SARS-CoV-2 individual ORFs in pDEST103 were transfected into and expressed by  
561 COS-7 cells (#CRL-1651, ATCC, Manassas, VA), which were lysed with three cycles of freeze-  
562 thaw treatment. Pooled lysates representing multiple SARS-CoV-2 proteins were added to  
563 PBMC at a 1:1 volume ratio for 18 hours.

564

565 For proliferation-based enrichment, PBMC were labeled with cell-trace violet (CTV)  
566 (ThermoFisher) and cultured at  $4 \times 10^6$ /well in 24-well plates in 2 ml (TCM) (25) for 5 days with  
567 SARS-CoV-2 peptide pools ( $\leq 54$  peptides/pool, 1  $\mu\text{g}/\text{ml}$  final each) covering S (6 pools), M (one  
568 pool), N (two pools), or NSP6 and E proteins (2 pools). After staining with anti-CD3-PE, anti-  
569 CD4-APC (ThermoFisher, S3.5), anti-CD8-FITC, and 7-AAD for viability, live CD3<sup>+</sup>CTV<sup>low</sup> cells  
570 with CD4<sup>-</sup>CD8<sup>+</sup> or CD4<sup>+</sup>CD8<sup>-</sup> phenotype were bulk-sorted (FACSARIA II, Becton Dickinson).  
571 Polyclonal CTV<sup>low</sup> T cell lines were expanded twice polyclonally (94).

572

573 **Tetramer sorting.** Monomeric HLA-β2M complexes with UV-labile peptide (BioLegend) were  
574 used for UV peptide exchange and tetramerized with streptavidin-APC or streptavidin-PE  
575 (Becton Dickinson) per the manufacturer. Bulk-expanded CD8 T cells (~10<sup>6</sup>) were stained in  
576 100 μl TCM with 2 μl tetramer for 30 minutes on ice, followed by anti-CD4-APC-H7 and anti-  
577 CD8α-FITC. After 7-AAD staining, live CD8<sup>+</sup>CD4<sup>-</sup>tetramer<sup>high</sup> cells were sorted, expanded (94),  
578 and cryopreserved. CD8 T cells recognizing Merkel cell polyomavirus (MCPyV) T antigen (T-Ag)  
579 aa 32-40/HLA A\*03:01 were tetramer-sorted from Merkel cell carcinoma tumor-infiltrating  
580 lymphocytes (28).

581

582 **T-cell functional assays.** CD8 TCL reactivity to viral proteins was measured using COS-7  
583 artificial antigen presenting cells (aAPC) co-transfected with subject-specific HLA class I cDNA  
584 and SARS-CoV-2 ORFs, or fragments of SARS-CoV-2 ORF1a/1ab (95). HLA A and B cDNA  
585 alleles were amplified by RT-PCR (94) or synthesized (Genscript), cloned into pcDNA3.1(-)  
586 (ThermoFisher) (96) and sequence-verified. COS-7 in 96-well flat plates were co-transfected  
587 with 100 ng/well each HLA cDNA and SARS-CoV-2-p103 plasmids, using FuGene6 (96). After  
588 2 days, 1 x 10<sup>5</sup> CD8 TCL/well were added for 24-48 hours into 200 μl TCM, and secreted IFN-  
589 gamma (IFN-γ) measured by ELISA (96). For CD8 T cell responses to peptides, aAPC  
590 expressed HLA cDNA only. At 2 days, 1-10 μg/ml viral peptide or DMSO control was added with  
591 responder TCL, or aAPC were peptide-pulsed for 1 hour at 37 °C, 5% CO<sub>2</sub> and washed prior to  
592 adding TCL. Alternatively, peptide specificity assays used autologous EBV-lymphocyte  
593 continuous line (EBV-LCL) as APC at 2-5 x 10<sup>4</sup> cells/well in 96-well U-bottom plates, in duplicate  
594 or triplicate, with 5-10 x 10<sup>5</sup> CD8 TCL responders/well. Single or pooled peptides were added at  
595 1 μg/ml each final in ≤ 0.3% DMSO. For a peptide to be listed as a CD8 T cell epitope, we  
596 required recognition (IFN-γ OD<sub>450</sub> > 2X DMSO control) of 1 μg/ml or less peptide in ≥ 2  
597 independent assays. To measure CD8 T cell recognition of SARS-CoV-2-infected cells, human  
598 bronchial epithelial cell 3 immortalized with cyclin dependent kinase 4 and human telomerase

599 reverse transcriptase (HBEC3-KT) (97) transduced with ACE2 (44) (HBE3-KT-A) were infected  
600 at MOI 2 in 6-well plates using strain WA1-GFP (gift of Dr. Ralph Baric), or mock-infected, for 24  
601 hours, harvested with Accutase (Thermo-Fisher) and plated at 20,000 cells/well in 96 well U-  
602 bottom plates. CD8 T cells were added (100,000/well) to a final volume of 200  $\mu$ l TCM.  
603 Supernatants after 24 hours were assayed by IFN- $\gamma$  ELISA (98).

604  
605 CD4 T cell assays for whole virus and IVTT proteins used PBMC as APC. In duplicate or  
606 triplicate 96-well U-bottoms, 5-10 x 10<sup>4</sup> each autologous PBMC and CD4 TCL were seeded in  
607 200  $\mu$ l TCM, with whole UV-treated SARS-CoV-2 or mock antigen (1:20-1:40), IVTT  
608 preparations (1:1000-1:2000) from SARS-CoV-2 or empty vector or HSV-2 gene-containing (99)  
609 negative controls, single or pooled peptides or DMSO control, or PHA-P (1.6  $\mu$ g/ml) positive  
610 control. T cell activation was determined by supernatant IFN- $\gamma$  by ELISA at 1-2 days or <sup>3</sup>H  
611 thymidine incorporation (proliferation assay at day 3-day 4 (100). When proliferation was  
612 measured, autologous PBMC were irradiated (3,300 rad, X-ray source). The criteria for positivity  
613 were that in duplicate assays, both raw CPM values were at least twice the average of the  
614 negative control wells containing irrelevant HSV antigens and media.

615  
616 Alternatively, responses to whole virus and IVTT proteins were measured by intracellular  
617 cytokine secretion (ICS). Polyclonal CD4 TCL were CTV-labeled (25). Autologous PBMC and  
618 CD4 TCL (2-5 x 10<sup>5</sup> each) were co-incubated in 200  $\mu$ l TCM in 96-well U-bottoms with antigens  
619 or controls at concentrations listed above. Co-stimulatory mAbs (anti-CD28 and anti-CD49d,  
620 BioLegend) and Brefeldin A were added (25) and cells analyzed after 16-18 hours. Cells were  
621 stained with Near-IR live/dead (ThermoFisher), lysed with 1X FACS lysing solution (Becton  
622 Dickinson), permeabilization with FACS Perm 2 (Becton Dickinson), and stained with anti-CD3-  
623 PE, anti-CD4-FITC (ThermoFisher, S3.5), and anti-CD8-PerCP5.5 (SK1), anti-IFN- $\gamma$ -PE-Cy7,  
624 (B27, Becton Dickson) and anti-IL-2 (MQ1-17H12, Becton Dickinson). Data were acquired with

625 FACSCANTO and cytokine expression quantified for live, CTV-positive CD3<sup>+</sup>CD4<sup>+</sup>CD8<sup>-</sup> single  
626 cells (FlowJo 10.7.1, Becton Dickinson). For ICS-based proteome screens of CD4 TCL, two  
627 criteria were both required to score a protein positive. The ratio of the percent of IFN- $\gamma$  and/or  
628 IL-2 positive CD4 T cells with SARS-CoV-2 antigen compared with pDEST203 empty vector-  
629 derived IVTT product, was > 2. For subjects W002 and W011 with high IFN- $\gamma$  background for  
630 pDEST203 empty vector, the percent of double-positive IFN- $\gamma$ /IL-2 cells, only, was used.  
631 Second, the difference in cytokine-positive cells between a SARS-CoV-2 protein and empty  
632 vector was > 1%.

633  
634 CD4 T cell peptide analyses used autologous EBV-LCL as APC. TCL (2-5 x 10<sup>4</sup>/well) and EBV-  
635 LCL (5-20 X 10<sup>3</sup>/well) were co-plated in 96-well U plates in duplicate or triplicate in 200  $\mu$ l TCM.  
636 Peptides at 1  $\mu$ g/ml each final concentration were added as pools or singletons in  $\leq$ 0.3%  
637 DMSO, or DMSO negative control. After 1 to 2 days, supernatant IFN- $\gamma$  was measured by  
638 ELISA. For some assays with high IFN- $\gamma$  ELISA OD<sub>450</sub> values for negative control stimuli, ELISA  
639 was performed with diluted supernatants. In order for a peptide to be reported as an epitope,  
640 two or more wells tested with 1  $\mu$ g/ml peptide were required to have an IFN- $\gamma$  OD<sub>450</sub> at least  
641 twice above DMSO background in at least two assays. For proliferation assays, peptides (1  
642  $\mu$ g/ml) were tested using autologous EBV-LCL (1 X 10<sup>4</sup>/well, irradiated 10,000 rad) and  
643 responder TCL (5 X 10<sup>4</sup>/well) in duplicate. For a peptide to be reported as an epitope, both  
644 replicates had a count per minute (CPM) value more than 2-fold the average CPM of DMSO  
645 negative controls, and, in follow-up triplicate screens, at least two of the three CPM values were  
646 more than 2-fold average CPM of negative controls. To enumerate CD4 T cell reactivities per-  
647 subject, each reactive peptide was counted as a separate epitope. If two variant SARS-CoV-2  
648 peptides were reactive for the same person, this was counted as one reactivity. Reactivities  
649 detected in more than one workflow or PBMC timepoint per person are counted once.

650 Responses to the same or variant peptides in multiple participants were analyzed both  
651 separately and after collapse to unique peptides.

652

653 We defined CD4 TCL HLA restriction as published (40). First, serial dilutions of peptide (1, 0.1,  
654 or 0.01  $\mu\text{g/ml}$ ) were tested in triplicate using autologous EBV-LCL as APC without or with mAbs  
655 that block HLA DR, DP, or DQ (100). To determine allele-level restriction, engineered APC  
656 expressing single HLA class II heterodimers were selected (40) to match the study subject.  
657 Negative controls were cells parental to the single antigen line (SAL). SAL assays typically used  
658 1  $\mu\text{g/ml}$  peptide or DMSO control. Some used SAL washed after a 1-hour pulse at 37 °C with  
659 peptides in titration. CD4 TCL were added and IFN- $\gamma$  secretion measured by ELISA. To  
660 estimate functional avidity, we set an index value of 100% to the difference between the mean  
661 IFN- $\gamma$  OD<sub>450</sub> values of 1  $\mu\text{g/ml}$  peptide and of DMSO. A peptide concentration was scored as  
662 positive if at least two of three triplicates at that concentration yielded net IFN- $\gamma$  OD<sub>450</sub> values  
663 (raw values minus the mean of DMSO) at least 30% of this index value. For selected peptide  
664 epitopes an alternative or expanded dilution series was used.

665

666 **TCR sequencing and analysis.** AIM (+) PBMC were flash frozen after sorting in a minimal  
667 volume of TCM and DNA manually isolated with the Qiagen blood kit for small samples. DNA  
668 from culture-expanded AIM (+) cells was isolated by Adaptive. T cell receptor beta (*TRB*)  
669 complementarity determining region 3 (CDR3) repertoire sequencing was performed at Adaptive  
670 Biotechnologies (Seattle, WA) using the Immunoseq™ TCRBv4b platform. Two replicate DNA  
671 aliquots were processed in parallel and only productive TRB CDR3 gene rearrangements  
672 present in at least one read in both replicates were reported. Analyses focused on functional  
673 CDR3 amino acid identity.

674

675 **Data availability.** T cell epitopes have been uploaded to IEDB(102) with accession numbers  
676 1000861 and 1000866. TCR datasets are in ImmuneACCESS (Adaptive).

677

678 **Approval.** By the University of Washington Institutional Review Board as Study00004312.

679

680 **Statistics and variant abundance.** Proportions of *ex vivo* AIM (+) cells were compared within-  
681 person between mock and stimulated conditions using Wilcoxon matched-pairs signed-ranks  
682 test (Instat 3.10, GraphPad, San Diego, CA). Proportions of *ex vivo* AIM (+) cells after  
683 stimulation were compared between clinical cohorts using Mann-Whitney test. P values are two-  
684 tailed. Correlation between IFN- $\gamma$  and proliferation results used linear regression and default  
685 parameters (Prism 9.1.0, GraphPad). To estimate the global prevalence of SARS-CoV-2 amino  
686 acid variants, the worldwide SARS-CoV-2 sequence dataset hosted at GISAID (89) was  
687 accessed (101) using the mutation details routine, while lineages containing specific mutations  
688 were queried via Nextstrain (23), which accesses a representative subset of GISAID.

689

690

691 Table 1. Summary of varied T cell recognition of SARS-CoV-2 peptides from strain Wu-1 and variants.

| T cell phenotype | HLA restriction <sup>1</sup>                   | protein | peptide <sup>2</sup> | Wu-1 <sup>3</sup> | variant    | variant recognition <sup>4</sup> | predicted HLA binding effect <sup>5</sup>         | PANGO lineage(s) <sup>6</sup> | prevalence <sup>7</sup> |
|------------------|------------------------------------------------|---------|----------------------|-------------------|------------|----------------------------------|---------------------------------------------------|-------------------------------|-------------------------|
| CD4              | DR                                             | S       | 37-49                | YYPDKVFRSSVLH     | H49Y       | reduced                          | not applicable                                    | B.1, others                   | 0.19%                   |
| CD4              | DRB1*07:01, DRB1*15:01                         | S       | 61-73                | NVTWFHAIHVSGT     | del69-70   | not detected                     | moderate decrement *07:01; large decrement *15:01 | B.1.1.7                       | 23.76%                  |
| CD4              | DRB1*11:01                                     | S       | 61-73                | NVTWFHAIHVSGT     | del69-70   | not detected                     | large decrement                                   | B.1.1.7                       | 23.76%                  |
| CD4              | DP, likely A1*01:03/B1*04:01                   | S       | 133-145              | FQFCNDPFLGVYY     | D138Y      | reduced                          | no effect                                         | B.1.351                       | 2.46%                   |
| CD4              | DP, likely A1*01:03/B1*04:01                   | S       | 133-145              | FQFCNDPFLGVYY     | G142D      | reduced                          | no effect                                         | B.1.617.2                     | 28.77%                  |
| CD4              | DP, likely A1*01:03/B1*04:01                   | S       | 133-145              | FQFCNDPFLGVYY     | Y144del    | reduced                          | moderate decrement                                | B.1.1.7                       | 23.46%                  |
| CD4              | DP, likely A1*01:03/B1*04:01                   | S       | 165-177              | NCTFEYVSQPFLM     | L176F      | reduced, not detected            | no effect                                         | multiple                      | 0.19%                   |
| CD4              | DR                                             | S       | 165-177              | NCTFEYVSQPFLM     | L176F      | reduced                          | not applicable                                    | multiple                      | 0.19%                   |
| CD4              | DR <sup>8</sup>                                | S       | 209-221              | PINLVRDLPQGFS     | D215H      | not detected                     | no effect                                         | multiple                      | 0.08%                   |
| CD4              | DR <sup>8</sup>                                | S       | 209-221              | PINLVRDLPQGFS     | D215G      | not detected                     | moderate/large decrement                          | B.1.351                       | 0.78%                   |
| CD4              | DR                                             | S       | 233-245              | INTRFQTLALH       | del242-244 | not detected                     | no effect/moderate decrement                      | B.1.351                       | 0.75%                   |
| CD8              | A*02:01                                        | S       | 269-277              | YLQPRTFLL         | P272L      | not detected                     | no effect                                         | B.1.177                       | 0.23%                   |
| CD8              | A*03:01                                        | S       | 378-386              | KCYGVSPK          | K378N      | not detected                     | moderate decrement                                | n/a                           | 0.01%                   |
| CD8              | A*02:01                                        | S       | 417-425              | KIADYNYKL         | K417N      | not detected                     | no effect                                         | B.1.351                       | 0.93%                   |
| CD8              | A*02:01                                        | S       | 417-425              | KIADYNYKL         | K417T      | not detected                     | no effect                                         | P.1                           | 2.26%                   |
| CD4              | DR                                             | S       | 485-497              | GFNCYEPLQSYGF     | F490S      | not detected                     | not applicable                                    | multiple                      | 0.29%                   |
| CD8              | A*29:02                                        | S       | 489-497              | YEPLQSYGF         | F490S      | not detected                     | moderate decrement                                | multiple                      | 0.29%                   |
| CD4              | unknown                                        | S       | 665-677              | PIGAGICASYQTQ     | Q677H      | increased                        | not applicable                                    | multiple                      | 1.10%                   |
| CD4              | unknown                                        | S       | 693-705              | IAYTMSLGAENSV     | A701V      | reduced                          | no effect                                         | B.1.351                       | 1.59%                   |
| CD4              | DRB1*07:01; DRB1*04:07/DRB4*01:03 <sup>9</sup> | S       | 717-729              | NFTISVITEILPV     | T723I      | reduced                          | moderate decrement                                | B.1.389                       | 0.03%                   |
| CD4              | DR                                             | S       | 973-985              | ISSVLNDILSRDL     | S982A      | not detected                     | not applicable                                    | B.1.1.7                       | 23.81%                  |

|     |            |       |           |               |         |              |                 |                        |        |
|-----|------------|-------|-----------|---------------|---------|--------------|-----------------|------------------------|--------|
| CD4 | DR         | S     | 1017-1029 | EIRASANLAAIKM | T1027I  | reduced      | no effect       | P.1                    | 2.53%  |
| CD4 | DRB1*03:01 | S     | 1113-1125 | QIITDNTFVSGN  | D1118H  | not detected | large decrement | B.1.1.7                | 23.81% |
| CD4 | DQ         | N     | 13-25     | PRITFGGPSDSTG | P13L    | reduced      | not applicable  | B.6.8, B.1.1.1, others | 0.69%  |
| CD4 | DR         | N     | 217-229   | AALALLLDRLNQ  | A220V   | neutral      | not applicable  | B.1.177.72, others     | 3.62%  |
| CD4 | unknown    | N     | 201-213   | SSRGTSPARMAGN | 203/204 | not detected |                 | multiple               | 30.07% |
| CD4 | unknown    | NSP6  | 3601-3613 | SLFFFLYENAFPL | L3606F  | not detected | not applicable  | B.6.8, many others     | 2.48%  |
| CD4 | unknown    | ORF3A | 241-253   | EEHVQIHTIDGSS | G251V   | not detected | not applicable  | multiple               | 0.16%  |
| CD8 | A*11:01    | M     | 169-181   | TVATSRILSYKYL | T175M   | not detected | no effect       | B.1.1                  | 0.05%  |

692

693

694 <sup>1</sup> Restricting locus for CD8 T cells proven using aAPC, and available information for CD4 T cells using locus-blocking mAbs and/or  
695 SAL.

696 <sup>2</sup> Amino acid number in protein in SARS-CoV-2 strain Wu-1 proteome. For NSP6, position in ORF1ab polypeptide.

697 <sup>3</sup> Amino acid sequence in SARS-CpoV-2 strain Wu-1.

698 <sup>4</sup> Summary of experimental data in this report. If differing effects are seen for > 1 participants' T cells, both results are listed. Not  
699 detected signifies >90% reduction in mean net IFN- $\gamma$  OD<sub>450</sub> at 1  $\mu$ g/ml peptide.

700 <sup>5</sup> Summary of predicted HLA binding to implicated HLA restricting allele, if determined, from consensus algorithms at  
701 <http://tools.iedb.org/main/tcell/>

702 <sup>6</sup> Derived from representative sampling of ~ 3500 worldwide complete sequences at <https://nextstrain.org/> accessed Nov 2021.

703 Lineages include B.1.1.7, also known as alpha, B.1.351, also known as beta, B.1.617.2, also known as delta, P.1, also known as  
704 gamma.



705 <sup>7</sup> Worldwide cumulative prevalence at [https://covid19dashboard.regeneron.com/?tab=Mutation\\_Details](https://covid19dashboard.regeneron.com/?tab=Mutation_Details) accessed Nov 2021.

706 <sup>8</sup> DRB1\*03:01 in one subject, DR locus in 2nd subject.

707 <sup>9</sup> Responses in one subject DRB1\*07:01 restricted; in 2nd subject restricted by both alleles shown; significantly reduced recognition

708 of variant for both subjects using autologous EBV-LCL as APC.

709 **Figure legends**

710

711 Fig. 1. AIM detection and enrichment of SARS-CoV-2 specific T cells in response to whole virus.

712 A: PBMC from participant W003 incubated with inactivated cell-associated SARS-CoV-2 or

713 mock antigen. Gating scheme at top. Lower panels show expression of activation markers

714 CD137 and CD69 in response to 18 hour stimulation amongst CD4 or CD8 T cells. B: Similar

715 layout for subject W005, specimen 1 PBMC stimulated with autologous moDC pre-treated with

716 SARS-CoV-2 or mock antigen. Gating scheme at top. For both stimulation methods, numbers

717 are percentages of gated T cells expressing dual activation markers. C: CD69/CD137 positive

718 CD4 T cells from the pathway in part A: were expanded and tested for reactivity with inactivated

719 cell-associated SARS-CoV-2 or mock antigen. Gated, live, responder, CD3+/CD4+/CD8-cells

720 are shown. Numbers are percent of cells accumulating the indicated cytokines.

721

722 Fig. 2. Recognition of infected respiratory epithelial cells by SARS-CoV-2-specific CD8

723 T cells. A: HBEC3-KT-A cells with or without infection with SARS-CoV-2 were co-

724 cultivated with tetramer-enriched, HLA A\*03:01-restricted, S 378-386-specific CD8 T

725 cells and activation measured by IFN- $\gamma$  secretion. S: S-specific T cells. M: control

726 MCPyV-specific CD8 T cells. B: Both T cell populations specifically recognized HBEC3-

727 KT-A cells treated with relevant viral peptide.

728

729 Fig. 3. SARS-CoV-2 CD8 T cell antigens and epitopes from PBMC stimulation with whole

730 SARS-CoV-2 antigen. A: Subject W005, specimen 1 CD8 TCL were assayed with aAPC

731 expressing each SARS-CoV-2 protein and relevant HLA A and B. Four reactivities were noted.

732 B: Subject W010 CD8 TCL is reactive with HLA A\*01:01 aAPC co-transfected with NSP3. For A:

733 and B: negative controls at right. C: CD8 TCL from B: assayed against column (C) and row (R)

734 pooled NSP3 peptides with autologous EBV-LCL as APC. D: Tetramer stain of CD8 TCL before

735 and after sorting and expansion of tetramer-positive cells. Percentages of tetramer-positive cells  
736 shown E: Reactivity of tetramer-enriched cells for aAPC transfected with the indicated plasmids  
737 or treated with the indicated peptides. F: Dose-response for HLA A\*01:01 aAPC with the  
738 indicated concentrations of NSP3 1637-1646. Duplicate or triplicate IFN- $\gamma$  release assays show  
739 raw data as bars (A) or dots for each value and means as bars (B, C, E, F).

740

741 Fig. 4. Summary of SARS-CoV-2 proteome-level T cell reactivity for PBMC after COVID-19  
742 illness, using AIM enrichment with whole viral antigen. Rows indicate donors and days between  
743 recovery from illness and PBMC sampling. Upper 5 rows were studied without DC boosting;  
744 lower 12 rows used this procedure. Columns are individual SARS-CoV-2 proteins. A: CD8 TCL  
745 scoring positive (purple). B: CD4 TCL scoring positive (red). At right are number of proteins  
746 recognized and at bottom are number of subjects with reactivity at one or more time points.

747

748 Fig. 5. A: CD4 TCL from PBMC stimulated with moDC and whole SARS-CoV-2 (subjects W001,  
749 W005, W012) or PBMC stimulated with whole SARS-CoV-2 (subject W003) recognize whole  
750 SARS-CoV-2, and sCoVOC43 or 229E antigens (V), but not mock (M) antigens. B: CD4 TCL  
751 from subject W001 recognizes full-length S protein from OC43 but not empty vector control. C:  
752 CD4 TCL recognize homologous S peptides from SARS-CoV-2 and OC43 in an HLA DR-  
753 restricted fashion as indicated by inhibition with locus-specific mAb. An overlapping SARS-CoV-  
754 2 peptide shows DRB1\*15:01 restriction at right. Conserved AA are underlined.

755

756 Fig. 6. CD8 TCL recognition by SARS-CoV-2 variant peptides. aAPC transfected with HLA  
757 A\*02:01 and treated with wild-type but not variant peptides were recognized by polyclonal CD8  
758 TCL lines. Lineage B.1.351 is also known as beta and P.1 is also known as gamma).

759

760 Fig. 7. CD4 TCL recognition by SARS-CoV-2 variant peptides. Summary of recognition of S  
761 strain Wu-1 peptides and variants. Donors indicated at top. Each Wu-1 peptide recognized by  
762 one or more subject is numbered at left. Coordinates and AA substitutions or deletions of  
763 variants tested are listed at right. Variants in WHO VOC indicated with blue square. Color codes  
764 at left summarize level of recognition of variant peptide by each TCL. VBM = variants being  
765 monitored, VOC = variants of concern per US CDC October 2021.



767 **References**

768

- 769 1. Hansen CH, Michlmayr D, Gubbels SM, Mølbak K, and Ethelberg S. Assessment of protection  
770 against reinfection with SARS-CoV-2 among 4 million PCR-tested individuals in Denmark in 2020:  
771 a population-level observational study. *Lancet (London, England)*. 2021.  
772 2. Topol EJ. Messenger RNA vaccines against SARS-CoV-2. *Cell*. 2021;184(6):1401.  
773 3. McMahan K, Yu J, Mercado NB, Loos C, Tostanoski LH, Chandrashekar A, et al. Correlates of  
774 protection against SARS-CoV-2 in rhesus macaques. *Nature*. 2021;590(7847):630-4.  
775 4. Tarke A, Sidney J, Kidd CK, Dan JM, Ramirez SI, Yu ED, et al. Comprehensive analysis of T cell  
776 immunodominance and immunoprevalence of SARS-CoV-2 epitopes in COVID-19 cases. *Cell*  
777 *reports Medicine*. 2021;2(2):100204.  
778 5. Snyder TM, Gittelman RM, Klinger M, May DH, Osborne EJ, Taniguchi R, et al. Magnitude and  
779 Dynamics of the T-Cell Response to SARS-CoV-2 Infection at Both Individual and Population  
780 Levels. *medRxiv*. 2020.  
781 6. Braun J, Loyal L, Frentsch M, Wendisch D, Georg P, Kurth F, et al. SARS-CoV-2-reactive T cells in  
782 healthy donors and patients with COVID-19. *Nature*. 2020;587(7833):270-4.  
783 7. Boonyaratanakornkit J, Morishima C, Selke S, Zamora D, McGuffin S, Shapiro AE, et al. Clinical,  
784 laboratory, and temporal predictors of neutralizing antibodies against SARS-CoV-2 among  
785 COVID-19 convalescent plasma donor candidates. *The Journal of clinical investigation*.  
786 2021;131(3).  
787 8. Yu KK, Fischinger S, Smith MT, Atyeo C, Cizmeci D, Wolf CR, et al. Comorbid illnesses are  
788 associated with altered adaptive immune responses to SARS-CoV-2. *JCI Insight*. 2021.  
789 9. Elyanow R, Snyder TM, Dalai SC, Gittelman RM, Boonyaratanakornkit J, Wald A, et al. T-cell  
790 receptor sequencing identifies prior SARS-CoV-2 infection and correlates with neutralizing  
791 antibody titers and disease severity. *medRxiv : the preprint server for health sciences*.  
792 2021:2021.03.19.21251426. In Revision, Journal of Clinical Investigation.  
793 10. Phan IQ, Subramanian S, Kim D, Murphy M, Pettie D, Carter L, et al. In silico detection of SARS-  
794 CoV-2 specific B-cell epitopes and validation in ELISA for serological diagnosis of COVID-19.  
795 *Scientific reports*. 2021;11(1):4290.  
796 11. Grifoni A, Weiskopf D, Ramirez SI, Mateus J, Dan JM, Moderbacher CR, et al. Targets of T Cell  
797 Responses to SARS-CoV-2 Coronavirus in Humans with COVID-19 Disease and Unexposed  
798 Individuals. *Cell*. 2020;181(7):1489-501.e15.  
799 12. Dan JM, Mateus J, Kato Y, Hastie KM, Yu ED, Faliti CE, et al. Immunological memory to SARS-  
800 CoV-2 assessed for up to eight months after infection. *bioRxiv : the preprint server for biology*.  
801 2020.  
802 13. Clute SC, Naumov YN, Watkin LB, Aslan N, Sullivan JL, Thorley-Lawson DA, et al. Broad cross-  
803 reactive TCR repertoires recognizing dissimilar Epstein-Barr and influenza A virus epitopes. *J*  
804 *Immunol*. 2010;185(11):6753-64.  
805 14. Vuorela A, Freitag TL, Leskinen K, Pessa H, Härkönen T, Stracenski I, et al. Enhanced influenza A  
806 H1N1 T cell epitope recognition and cross-reactivity to protein-O-mannosyltransferase 1 in  
807 Pandemrix-associated narcolepsy type 1. *Nature communications*. 2021;12(1):2283.  
808 15. Chiou SH, Tseng D, Reuben A, Mallajosyula V, Molina IS, Conley S, et al. Global analysis of shared  
809 T cell specificities in human non-small cell lung cancer enables HLA inference and antigen  
810 discovery. *Immunity*. 2021;54(3):586-602.e8.  
811 16. Huisman W, Lebox DAT, van der Maarel LE, Hageman L, Amsen D, Falkenburg JHF, et al.  
812 Magnitude of Off-Target Allo-HLA Reactivity by Third-Party Donor-Derived Virus-Specific T Cells  
813 Is Dictated by HLA-Restriction. *Frontiers in immunology*. 2021;12:630440.

- 814 17. Koelle DM, Chen HB, McClurkan CM, and Petersdorf EW. Herpes simplex virus type 2-specific  
815 CD8 cytotoxic T lymphocyte cross-reactivity against prevalent HLA class I alleles. *Blood*.  
816 2002;99(10):3844-7.
- 817 18. Hammer GE, Kanaseki T, and Shastri N. The final touches make perfect the peptide-MHC class I  
818 repertoire. *Immunity*. 2007;26(4):397-406.
- 819 19. Starck SR, and Shastri N. Nowhere to hide: unconventional translation yields cryptic peptides for  
820 immune surveillance. *Immunological reviews*. 2016;272(1):8-16.
- 821 20. Lineburg KE, Grant EJ, Swaminathan S, Chatzileontiadou DSM, Szeto C, Sloane H, et al. CD8(+)  
822 T cells specific for an immunodominant SARS-CoV-2 nucleocapsid epitope cross-react with  
823 selective seasonal coronaviruses. *Immunity*. 2021;54(5):1055-65.e5.
- 824 21. McCarthy KR, Rennick LJ, Nambulli S, Robinson-McCarthy LR, Bain WG, Haidar G, et al. Recurrent  
825 deletions in the SARS-CoV-2 spike glycoprotein drive antibody escape. *Science (New York, NY)*.  
826 2021;371(6534):1139-42.
- 827 22. Tegally H, Wilkinson E, Giovanetti M, Iranzadeh A, Fonseca V, Giandhari J, et al. Emergence of a  
828 SARS-CoV-2 variant of concern with mutations in spike glycoprotein. *Nature*. 2021.
- 829 23. Hadfield J, Megill C, Bell SM, Huddleston J, Potter B, Callender C, et al. Nextstrain: real-time  
830 tracking of pathogen evolution. *Bioinformatics (Oxford, England)*. 2018;34(23):4121-3.
- 831 24. Bouhaddou M, Memon D, Meyer B, White KM, Rezelj VV, Correa Marrero M, et al. The Global  
832 Phosphorylation Landscape of SARS-CoV-2 Infection. *Cell*. 2020;182(3):685-712.e19.
- 833 25. Hanson DJ, Tsvetkova O, Rerolle GF, Greninger AL, Sette A, Jing L, et al. Genome-Wide Approach  
834 to the CD4 T-Cell Response to Human Herpesvirus 6B. *J Virol*. 2019;93(14).
- 835 26. DeWitt WS, Emerson RO, Lindau P, Vignali M, Snyder TM, Desmarais C, et al. Dynamics of the  
836 cytotoxic T cell response to a model of acute viral infection. *J Virol*. 2015;89(8):4517-26.
- 837 27. Ferretti AP, Kula T, Wang Y, Nguyen DMV, Weinheimer A, Dunlap GS, et al. Unbiased Screens  
838 Show CD8(+) T Cells of COVID-19 Patients Recognize Shared Epitopes in SARS-CoV-2 that Largely  
839 Reside outside the Spike Protein. *Immunity*. 2020;53(5):1095-107.e3.
- 840 28. Jing L, Ott M, Church CD, Kulikauskas RM, Ibrani D, Iyer JG, et al. Prevalent and Diverse  
841 Intratumoral Oncoprotein-Specific CD8(+) T Cells within Polyomavirus-Driven Merkel Cell  
842 Carcinomas. *Cancer immunology research*. 2020;8(5):648-59.
- 843 29. Kim DK, Knapp JJ, Kuang D, Chawla A, Cassonnet P, Lee H, et al. A Comprehensive, Flexible  
844 Collection of SARS-CoV-2 Coding Regions. *G3 (Bethesda, Md)*. 2020;10(9):3399-402.
- 845 30. Jing L, Haas, J., Chong, T.M., Bruckner, J.J., Dann, G.C., Dong, L., Marshak, J.O., McClurkan, C.L.,  
846 Yamamoto, T.N., Bailer, S.M., Laing, K.J., Wald, A., Verjans, G.M.G.M., Koelle, D.M. Herpes  
847 simplex virus type 1 T-cells antigens in humans revealed by cross-presentation and genome-  
848 wide screening. *Journal of Clinical Investigation*. 2012;122:654-73.
- 849 31. Sette A, and Crotty S. Adaptive immunity to SARS-CoV-2 and COVID-19. *Cell*. 2021;184(4):861-  
850 80.
- 851 32. Le Bert N, Clapham HE, Tan AT, Chia WN, Tham CYL, Lim JM, et al. Highly functional virus-specific  
852 cellular immune response in asymptomatic SARS-CoV-2 infection. *J Exp Med*. 2021;218(5).
- 853 33. Wyllie D, Jones HE, Mulchandani R, Trickey A, Taylor-Phillips S, Brooks T, et al. SARS-CoV-2  
854 responsive T cell numbers and anti-Spike IgG levels are both associated with protection from  
855 COVID-19: A prospective cohort study in keyworkers. *medRxiv*. 2021:2020.11.02.20222778.
- 856 34. Van Damme KFA, Tavernier S, Van Roy N, De Leeuw E, Declercq J, Bosteels C, et al. Case Report:  
857 Convalescent Plasma, a Targeted Therapy for Patients with CVID and Severe COVID-19. *Frontiers*  
858 *in immunology*. 2020;11:596761.
- 859 35. Tarhini H, Reicoing A, Bridier-Nahmias A, Rahi M, Lambert C, Martres P, et al. Long term SARS-  
860 CoV-2 infectiousness among three immunocompromised patients: from prolonged viral  
861 shedding to SARS-CoV-2 superinfection. *The Journal of infectious diseases*. 2021.

- 862 36. Shaan Lakshmanappa Y, Elizaldi SR, Roh JW, Schmidt BA, Carroll TD, Weaver KD, et al. SARS-CoV-  
863 2 induces robust germinal center CD4 T follicular helper cell responses in rhesus macaques.  
864 *Nature communications*. 2021;12(1):541.
- 865 37. Blum JS, Wearsch PA, and Cresswell P. Pathways of antigen processing. *Annual review of*  
866 *immunology*. 2013;31:443-73.
- 867 38. Matyushenko V, Isakova-Sivak I, Kudryavtsev I, Goshina A, Chistyakova A, Stepanova E, et al.  
868 Detection of IFN $\gamma$ -Secreting CD4(+) and CD8(+) Memory T Cells in COVID-19 Convalescents  
869 after Stimulation of Peripheral Blood Mononuclear Cells with Live SARS-CoV-2. *Viruses*.  
870 2021;13(8).
- 871 39. Jing L, Schiffer JT, Chong TM, Bruckner JJ, Davies DH, Felgner PL, et al. CD4 T-cell memory  
872 responses to viral infections of humans show pronounced immunodominance independent of  
873 duration or viral persistence. *J Virol*. 2013;87(5):2617-27.
- 874 40. Campbell VL, Nguyen L, Snoey E, McClurkan CL, Laing KJ, Dong L, et al. Proteome-Wide Zika Virus  
875 CD4 T Cell Epitope and HLA Restriction Determination. *Immunohorizons*. 2020;4(8):444-53.
- 876 41. Nayak K, Jing L, Russell RM, Davies DH, Hermanson G, Molina DM, et al. Identification of novel  
877 Mycobacterium tuberculosis CD4 T-cell antigens via high throughput proteome screening.  
878 *Tuberculosis (Edinb)*. 2015;95(3):275-87.
- 879 42. Laing KJ, Russell RM, Dong L, Schmid DS, Stern M, Magaret A, et al. Zoster vaccination increases  
880 the breadth of CD4+ T cells responsive to varicella zoster virus. *The Journal of infectious*  
881 *diseases*. 2015.
- 882 43. Diao B, Wang C, Wang R, Feng Z, Zhang J, Yang H, et al. Human kidney is a target for novel  
883 severe acute respiratory syndrome coronavirus 2 infection. *Nature communications*.  
884 2021;12(1):2506.
- 885 44. Addetia A, Lieberman NAP, Phung Q, Hsiang TY, Xie H, Roychoudhury P, et al. SARS-CoV-2 ORF6  
886 Disrupts Bidirectional Nucleocytoplasmic Transport through Interactions with Rae1 and Nup98.  
887 *mBio*. 2021;12(2).
- 888 45. Akilesh S, Nicosia RF, Alpers CE, Tretiakova M, Hsiang TY, Gale M, Jr., et al. Characterizing Viral  
889 Infection by Electron Microscopy: Lessons from the Coronavirus Disease 2019 Pandemic. *The*  
890 *American journal of pathology*. 2021;191(2):222-7.
- 891 46. Lodes N, Seidensticker K, Perniss A, Nietzer S, Oberwinkler H, May T, et al. Investigation on  
892 Ciliary Functionality of Different Airway Epithelial Cell Lines in Three-Dimensional Cell Culture.  
893 *Tissue engineering Part A*. 2020;26(7-8):432-40.
- 894 47. Ahn JH, Kim J, Hong SP, Choi SY, Yang MJ, Ju YS, et al. Nasal ciliated cells are primary targets for  
895 SARS-CoV-2 replication in the early stage of COVID-19. *The Journal of clinical investigation*.  
896 2021;131(13).
- 897 48. Zhang Y, Chen Y, Li Y, Huang F, Luo B, Yuan Y, et al. The ORF8 protein of SARS-CoV-2 mediates  
898 immune evasion through down-regulating MHC-I. *Proceedings of the National Academy of*  
899 *Sciences of the United States of America*. 2021;118(23).
- 900 49. Wagner Klea. Recruitment of highly functional SARS-CoV-2-specific CD8+ T cell receptors  
901 mediating cytotoxicity of virus-infected target cells in non-severe COVID-19. 2021.
- 902 50. Koelle DM, Tigges MA, Burke RL, Symington FW, Riddell SR, Abbo H, et al. Herpes simplex virus  
903 infection of human fibroblasts and keratinocytes inhibits recognition by cloned CD8+ cytotoxic T  
904 lymphocytes. *Journal of Clinical Investigation*. 1993;91:961-8.
- 905 51. Kaneko N, Boucau J, Kuo HH, Perugino C, Mahajan VS, Farmer JR, et al. Expansion of Cytotoxic  
906 CD4+ T cells in the lungs in severe COVID-19. *medRxiv*. 2021.
- 907 52. Meckiff BJ, Ramirez-Suastegui C, Fajardo V, Chee SJ, Kusnadi A, Simon H, et al. Imbalance of  
908 Regulatory and Cytotoxic SARS-CoV-2-Reactive CD4(+) T Cells in COVID-19. *Cell*.  
909 2020;183(5):1340-53 e16.



- 910 53. Ramos da Silva S, Ju E, Meng W, Paniz Mondolfi AE, Dacic S, Green A, et al. Broad Severe Acute  
911 Respiratory Syndrome Coronavirus 2 Cell Tropism and Immunopathology in Lung Tissues From  
912 Fatal Coronavirus Disease 2019. *The Journal of infectious diseases*. 2021;223(11):1842-54.
- 913 54. Bojkova D, Klann K, Koch B, Widera M, Krause D, Ciesek S, et al. Proteomics of SARS-CoV-2-  
914 infected host cells reveals therapy targets. *Nature*. 2020;583(7816):469-72.
- 915 55. Davidson AD, Williamson MK, Lewis S, Shoemark D, Carroll MW, Heesom KJ, et al.  
916 Characterisation of the transcriptome and proteome of SARS-CoV-2 reveals a cell passage  
917 induced in-frame deletion of the furin-like cleavage site from the spike glycoprotein. *Genome  
918 medicine*. 2020;12(1):68.
- 919 56. Ihling C, Tänzler D, Hagemann S, Kehlen A, Hüttelmaier S, Arlt C, et al. Mass Spectrometric  
920 Identification of SARS-CoV-2 Proteins from Gargle Solution Samples of COVID-19 Patients.  
921 *Journal of proteome research*. 2020;19(11):4389-92.
- 922 57. Nikolaev EN, Indeykina MI, Brzhozovskiy AG, Bugrova AE, Kononikhin AS, Starodubtseva NL, et  
923 al. Mass-Spectrometric Detection of SARS-CoV-2 Virus in Scrapings of the Epithelium of the  
924 Nasopharynx of Infected Patients via Nucleocapsid N Protein. *Journal of proteome research*.  
925 2020;19(11):4393-7.
- 926 58. Jing L, Chong TM, Byrd B, McClurkan CL, Huang J, Story BT, et al. Dominance and diversity in the  
927 primary human CD4 T cell response to replication-competent vaccinia virus. *J Immunol*.  
928 2007;178(10):6374-86.
- 929 59. Le Bert N, Tan AT, Kunasegaran K, Tham CYL, Hafezi M, Chia A, et al. SARS-CoV-2-specific T cell  
930 immunity in cases of COVID-19 and SARS, and uninfected controls. *Nature*. 2020;584(7821):457-  
931 62.
- 932 60. Nelde A, Bilich T, Heitmann JS, Maringer Y, Salih HR, Roerden M, et al. SARS-CoV-2-derived  
933 peptides define heterologous and COVID-19-induced T cell recognition. *Nature immunology*.  
934 2021;22(1):74-85.
- 935 61. Oja AE, Saris A, Ghandour CA, Kragten NAM, Hogema BM, Nossent EJ, et al. Divergent SARS-CoV-  
936 2-specific T- and B-cell responses in severe but not mild COVID-19 patients. *European journal of  
937 immunology*. 2020;50(12):1998-2012.
- 938 62. Peng Y, Mentzer AJ, Liu G, Yao X, Yin Z, Dong D, et al. Broad and strong memory CD4(+) and  
939 CD8(+) T cells induced by SARS-CoV-2 in UK convalescent individuals following COVID-19. *Nature  
940 immunology*. 2020;21(11):1336-45.
- 941 63. Gordon DE, Hiatt J, Bouhaddou M, Rezelj VV, Ulferts S, Braberg H, et al. Comparative host-  
942 coronavirus protein interaction networks reveal pan-viral disease mechanisms. *Science (New  
943 York, NY)*. 2020;370(6521).
- 944 64. Jiang HW, Li Y, Zhang HN, Wang W, Yang X, Qi H, et al. SARS-CoV-2 proteome microarray for  
945 global profiling of COVID-19 specific IgG and IgM responses. *Nature communications*.  
946 2020;11(1):3581.
- 947 65. Wu J, Shi Y, Pan X, Wu S, Hou R, Zhang Y, et al. SARS-CoV-2 ORF9b inhibits RIG-I-MAVS antiviral  
948 signaling by interrupting K63-linked ubiquitination of NEMO. *Cell reports*. 2021;34(7):108761.
- 949 66. Tarke A, Sidney J, Methot N, Zhang Y, Dan JM, Goodwin B, et al. Negligible impact of SARS-CoV-2  
950 variants on CD4 (+) and CD8 (+) T cell reactivity in COVID-19 exposed donors and vaccinees.  
951 *bioRxiv : the preprint server for biology*. 2021.
- 952 67. Agerer B, Koblishcke M, Gudipati V, Montaña-Gutierrez LF, Smyth M, Popa A, et al. SARS-CoV-2  
953 mutations in MHC-I-restricted epitopes evade CD8(+) T cell responses. *Science immunology*.  
954 2021;6(57).
- 955 68. Yang X, Gao M, Chen G, Pierce BG, Lu J, Weng NP, et al. Structural Basis for Clonal Diversity of  
956 the Public T Cell Response to a Dominant Human Cytomegalovirus Epitope. *The Journal of  
957 biological chemistry*. 2015;290(48):29106-19.

- 958 69. Laing KJ, Dong L, Sidney J, Sette A, and Koelle DM. Immunology in the Clinic Review Series; focus  
959 on host responses: T cell responses to herpes simplex viruses. *Clin Exp Immunol.* 2012;167(1):47-  
960 58.
- 961 70. Jing L, Laing KJ, Dong L, Russell RM, Barlow RS, Haas JG, et al. Extensive CD4 and CD8 T Cell  
962 Cross-Reactivity between Alphaherpesviruses. *J Immunol.* 2016;196(5):2205-18.
- 963 71. de Silva TI, Liu G, Lindsey BB, Dong D, Moore SC, Hsu NS, et al. The impact of viral mutations on  
964 recognition by SARS-CoV-2 specific T-cells. *iScience.* 2021:103353.
- 965 72. Keeton R, Richardson SI, Moyo-Gwete T, Hermanus T, Tincho MB, Benede N, et al. Prior  
966 infection with SARS-CoV-2 boosts and broadens Ad26.COVS immunogenicity in a variant-  
967 dependent manner. *Cell host & microbe.* 2021.
- 968 73. Choi A, Koch M, Wu K, Chu L, Ma L, Hill A, et al. Safety and immunogenicity of SARS-CoV-2  
969 variant mRNA vaccine boosters in healthy adults: an interim analysis. *Nature medicine.* 2021.
- 970 74. Mateus J, Grifoni A, Tarke A, Sidney J, Ramirez SI, Dan JM, et al. Selective and cross-reactive  
971 SARS-CoV-2 T cell epitopes in unexposed humans. *Science (New York, NY).* 2020;370(6512):89-  
972 94.
- 973 75. Schmidt KG, Nganou-Makamdop K, Tenbusch M, El Kenz B, Maier C, Lapuente D, et al. SARS-  
974 CoV-2-Seronegative Subjects Target CTL Epitopes in the SARS-CoV-2 Nucleoprotein Cross-  
975 Reactive to Common Cold Coronaviruses. *Frontiers in immunology.* 2021;12:627568.
- 976 76. Mateus J, Dan JM, Zhang Z, Rydzynski Moderbacher C, Lammers M, Goodwin B, et al. Low-dose  
977 mRNA-1273 COVID-19 vaccine generates durable memory enhanced by cross-reactive T cells.  
978 *Science (New York, NY).* 2021;374(6566):eabj9853.
- 979 77. Ng KW, Faulkner N, Wrobel AG, Gamblin SJ, and Kassiotis G. Heterologous humoral immunity to  
980 human and zoonotic coronaviruses: Aiming for the achilles heel. *Seminars in immunology.*  
981 2021:101507.
- 982 78. Aguilar-Bretones M, Westerhuis BM, Raadsen MP, de Bruin E, Chandler FD, Okba NM, et al.  
983 Seasonal coronavirus-specific B cells with limited SARS-CoV-2 cross-reactivity dominate the IgG  
984 response in severe COVID-19. *The Journal of clinical investigation.* 2021;131(21).
- 985 79. Sagar M, Reifler K, Rossi M, Miller NS, Sinha P, White LF, et al. Recent endemic coronavirus  
986 infection is associated with less-severe COVID-19. *The Journal of clinical investigation.*  
987 2021;131(1).
- 988 80. Nguyen THO, Rowntree LC, Petersen J, Chua BY, Hensen L, Kedzierski L, et al. CD8(+) T cells  
989 specific for an immunodominant SARS-CoV-2 nucleocapsid epitope display high naive precursor  
990 frequency and TCR promiscuity. *Immunity.* 2021;54(5):1066-82 e5.
- 991 81. Nolan S, Vignali M, Klinger M, Dines JN, Kaplan IM, Svejnoha E, et al. A large-scale database of T-  
992 cell receptor beta (TCRbeta) sequences and binding associations from natural and synthetic  
993 exposure to SARS-CoV-2. *Research square.* 2020.
- 994 82. Breton G, Mendoza P, Hagglof T, Oliveira TY, Schaefer-Babajew D, Gaebler C, et al. Persistent  
995 cellular immunity to SARS-CoV-2 infection. *J Exp Med.* 2021;218(4).
- 996 83. Fischer DS, Ansari M, Wagner KI, Jarosch S, Huang Y, Mayr CH, et al. Single-cell RNA sequencing  
997 reveals ex vivo signatures of SARS-CoV-2-reactive T cells through 'reverse phenotyping'. *Nature*  
998 *communications.* 2021;12(1):4515.
- 999 84. Deng X, Gu W, Federman S, du Plessis L, Pybus OG, Faria NR, et al. Genomic surveillance reveals  
1000 multiple introductions of SARS-CoV-2 into Northern California. *Science.* 2020;369(6503):582-7.
- 1001 85. Rathe JA, Hemann EA, Eggenberger J, Li Z, Knoll ML, Stokes C, et al. SARS-CoV-2 Serologic Assays  
1002 in Control and Unknown Populations Demonstrate the Necessity of Virus Neutralization Testing.  
1003 *The Journal of infectious diseases.* 2021;223(7):1120-31.

- 1004 86. Greaney AJ, Loes AN, Crawford KHD, Starr TN, Malone KD, Chu HY, et al. Comprehensive  
1005 mapping of mutations in the SARS-CoV-2 receptor-binding domain that affect recognition by  
1006 polyclonal human plasma antibodies. *Cell host & microbe*. 2021;29(3):463-76.e6.
- 1007 87. Greaney AJ, Starr TN, Gilchuk P, Zost SJ, Binshtein E, Loes AN, et al. Complete Mapping of  
1008 Mutations to the SARS-CoV-2 Spike Receptor-Binding Domain that Escape Antibody Recognition.  
1009 *Cell host & microbe*. 2021;29(1):44-57.e9.
- 1010 88. Collier DA, De Marco A, Ferreira I, Meng B, Datir RP, Walls AC, et al. Sensitivity of SARS-CoV-2  
1011 B.1.1.7 to mRNA vaccine-elicited antibodies. *Nature*. 2021;593(7857):136-41.
- 1012 89. Shu Y, and McCauley J. GISAID: Global initiative on sharing all influenza data - from vision to  
1013 reality. *Euro surveillance : bulletin Europeen sur les maladies transmissibles = European*  
1014 *communicable disease bulletin*. 2017;22(13).
- 1015 90. Kell A, Stoddard M, Li H, Marcotrigiano J, Shaw GM, and Gale M, Jr. Pathogen-Associated  
1016 Molecular Pattern Recognition of Hepatitis C Virus Transmitted/Founder Variants by RIG-I Is  
1017 Dependent on U-Core Length. *J Virol*. 2015;89(21):11056-68.
- 1018 91. Esposito D, Mehalko J, Drew M, Snead K, Wall V, Taylor T, et al. Optimizing high-yield production  
1019 of SARS-CoV-2 soluble spike trimers for serology assays. *Protein expression and purification*.  
1020 2020;174:105686.
- 1021 92. Davies NG, Abbott S, Barnard RC, Jarvis CI, Kucharski AJ, Munday JD, et al. Estimated  
1022 transmissibility and impact of SARS-CoV-2 lineage B.1.1.7 in England. *Science (New York, NY)*.  
1023 2021;372(6538).
- 1024 93. Voloch CM, da Silva Francisco R, Jr., de Almeida LGP, Cardoso CC, Brustolini OJ, Gerber AL, et al.  
1025 Genomic characterization of a novel SARS-CoV-2 lineage from Rio de Janeiro, Brazil. *J Virol*.  
1026 2021.
- 1027 94. Koelle DM. Expression cloning for the discovery of viral antigens and epitopes recognized by T-  
1028 cells. *Methods*. 2003;29:213-26.
- 1029 95. V'Kovski P, Kratzel A, Steiner S, Stalder H, and Thiel V. Coronavirus biology and replication:  
1030 implications for SARS-CoV-2. *Nature reviews Microbiology*. 2021;19(3):155-70.
- 1031 96. Koelle DM, Chen HB, Gavin MA, Wald A, Kwok WW, and Corey L. CD8 CTL from genital herpes  
1032 simplex lesions: recognition of viral tegument and immediate early proteins and lysis of infected  
1033 cutaneous cells. *J Immunol*. 2001;166(6):4049-58.
- 1034 97. Ramirez RD, Sheridan S, Girard L, Sato M, Kim Y, Pollack J, et al. Immortalization of human  
1035 bronchial epithelial cells in the absence of viral oncoproteins. *Cancer Res*. 2004;64(24):9027-34.
- 1036 98. Koelle DM, Chen H, Gavin MA, Wald A, Kwok WW, and Corey L. CD8 CTL from genital herpes  
1037 simplex lesions: recognition of viral tegument and immediate early proteins and lysis of infected  
1038 cutaneous cells. *Journal of Immunology*. 2001;166:4049-58.
- 1039 99. Johnston C, Zhu J, Jing L, Laing KJ, McClurkan CM, Klock A, et al. Virologic and immunologic  
1040 evidence of multifocal genital herpes simplex virus 2 infection. *Journal of virology*.  
1041 2014;88(9):4921-31.
- 1042 100. Koelle DM, Corey L, Burke RL, Eisenberg RJ, Cohen GH, Pichyangkura R, et al. Antigenic  
1043 specificity of human CD4+ T cell clones recovered from recurrent genital HSV-2 lesions. *Journal*  
1044 *of virology*. 1994;68:2803-10.
- 1045 101. Yasukawa M, and Zarlring JM. Autologous herpes simplex virus-infected cells are lysed by human  
1046 natural killer cells. *Journal of Immunology*. 1983;131(4):2011-6.
- 1047 102. Vita R, Overton JA, Greenbaum JA, Ponomarenko J, Clark JD, Cantrell JR, et al. The immune  
1048 epitope database (IEDB) 3.0. *Nucleic Acids Res*. 2015;43(Database issue):D405-12.

1049

Fig.1

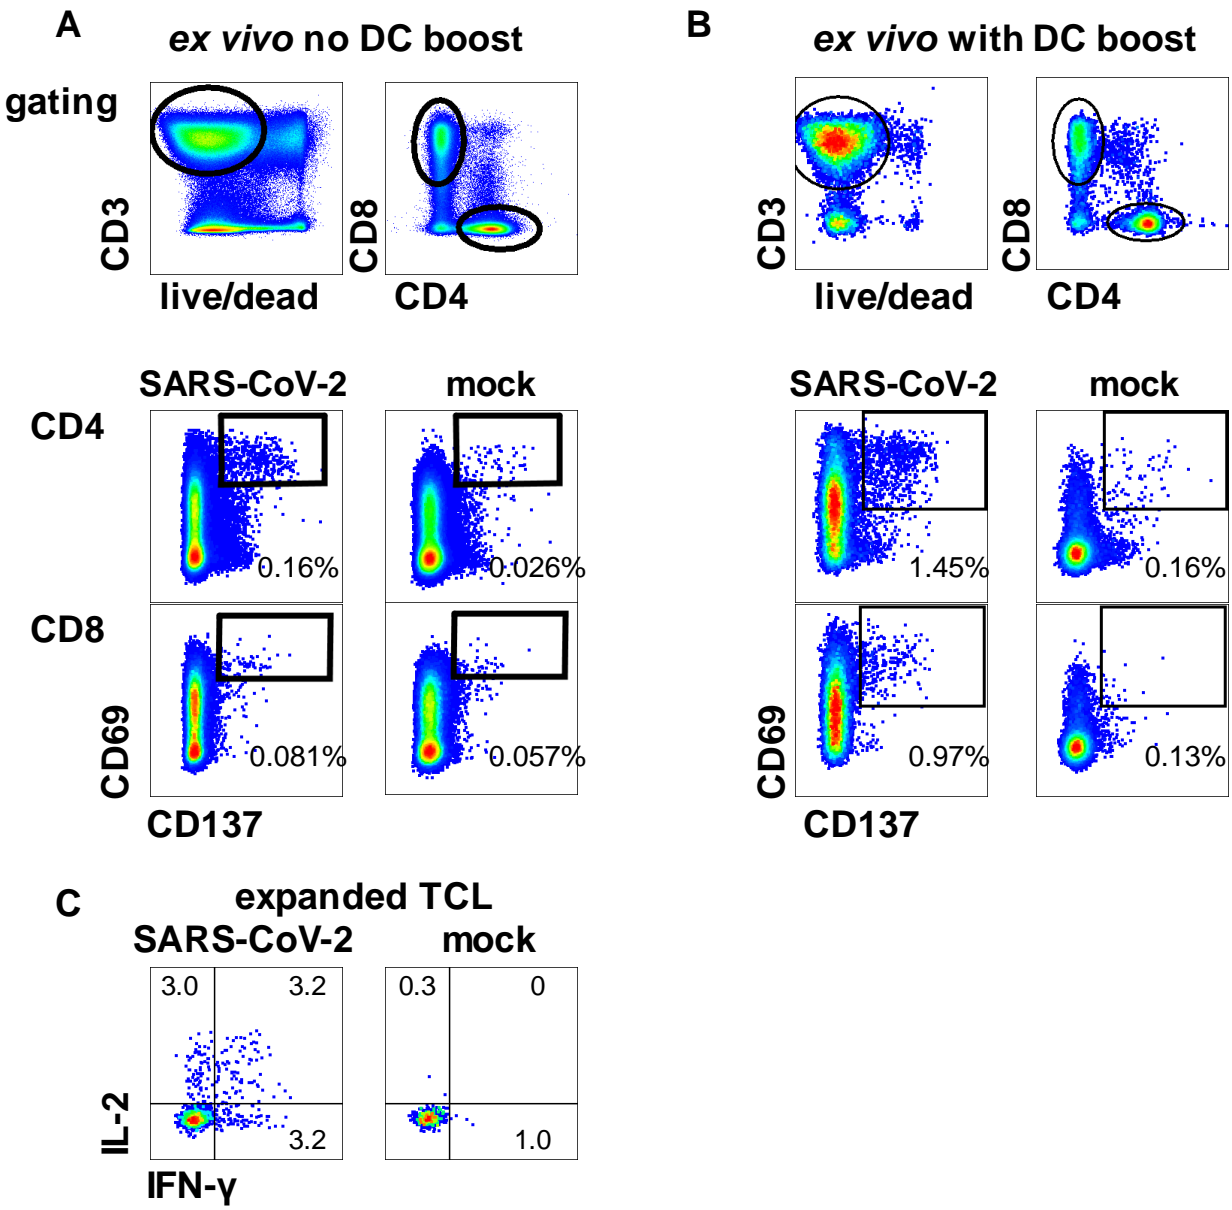

Fig. 1. AIM detection and enrichment of SARS-CoV-2 specific T cells in response to whole virus. A: PBMC from participant W003 incubated with inactivated cell-associated SARS-CoV-2 or mock antigen. Gating scheme at top. Lower panels show expression of activation markers CD137 and CD69 in response to 18 hour stimulation amongst CD4 or CD8 T cells. B: Similar layout for subject W005, specimen 1 PBMC stimulated with autologous moDC pre-treated with SARS-CoV-2 or mock antigen. Gating scheme at top. For both stimulation methods, numbers are percentages of gated T cells expressing dual activation markers. C: CD69/CD137 positive CD4 T cells from the pathway in part A: were expanded and tested for reactivity with inactivated cell-associated SARS-CoV-2 or mock antigen. Gated, live, responder, CD3+/CD4+/CD8- cells are shown. Numbers are percent of cells accumulating the indicated cytokines.

Fig.2

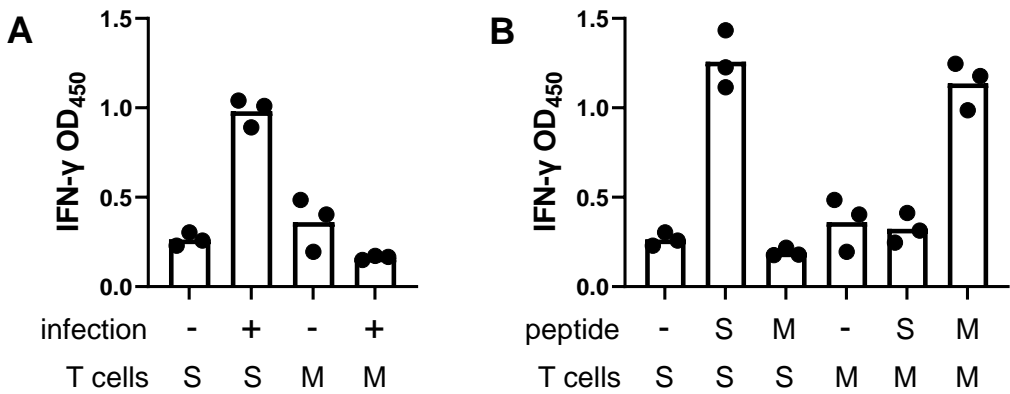

Fig. 2. Recognition of infected respiratory epithelial cells by SARS-CoV-2-specific CD8 T cells. A: HBEC3-KT-A cells with or without infection with SARS-CoV-2 were co-cultivated with tetramer-enriched, HLA A\*03:01-restricted, S 378-386-specific CD8 T cells and activation measured by IFN- $\gamma$  secretion. S: spike-specific T cells. M: control MCPyV-specific CD8 T cells. B: Both T cell populations specifically recognized HBEC3-KT-A cells treated with relevant viral peptide.

Fig.3

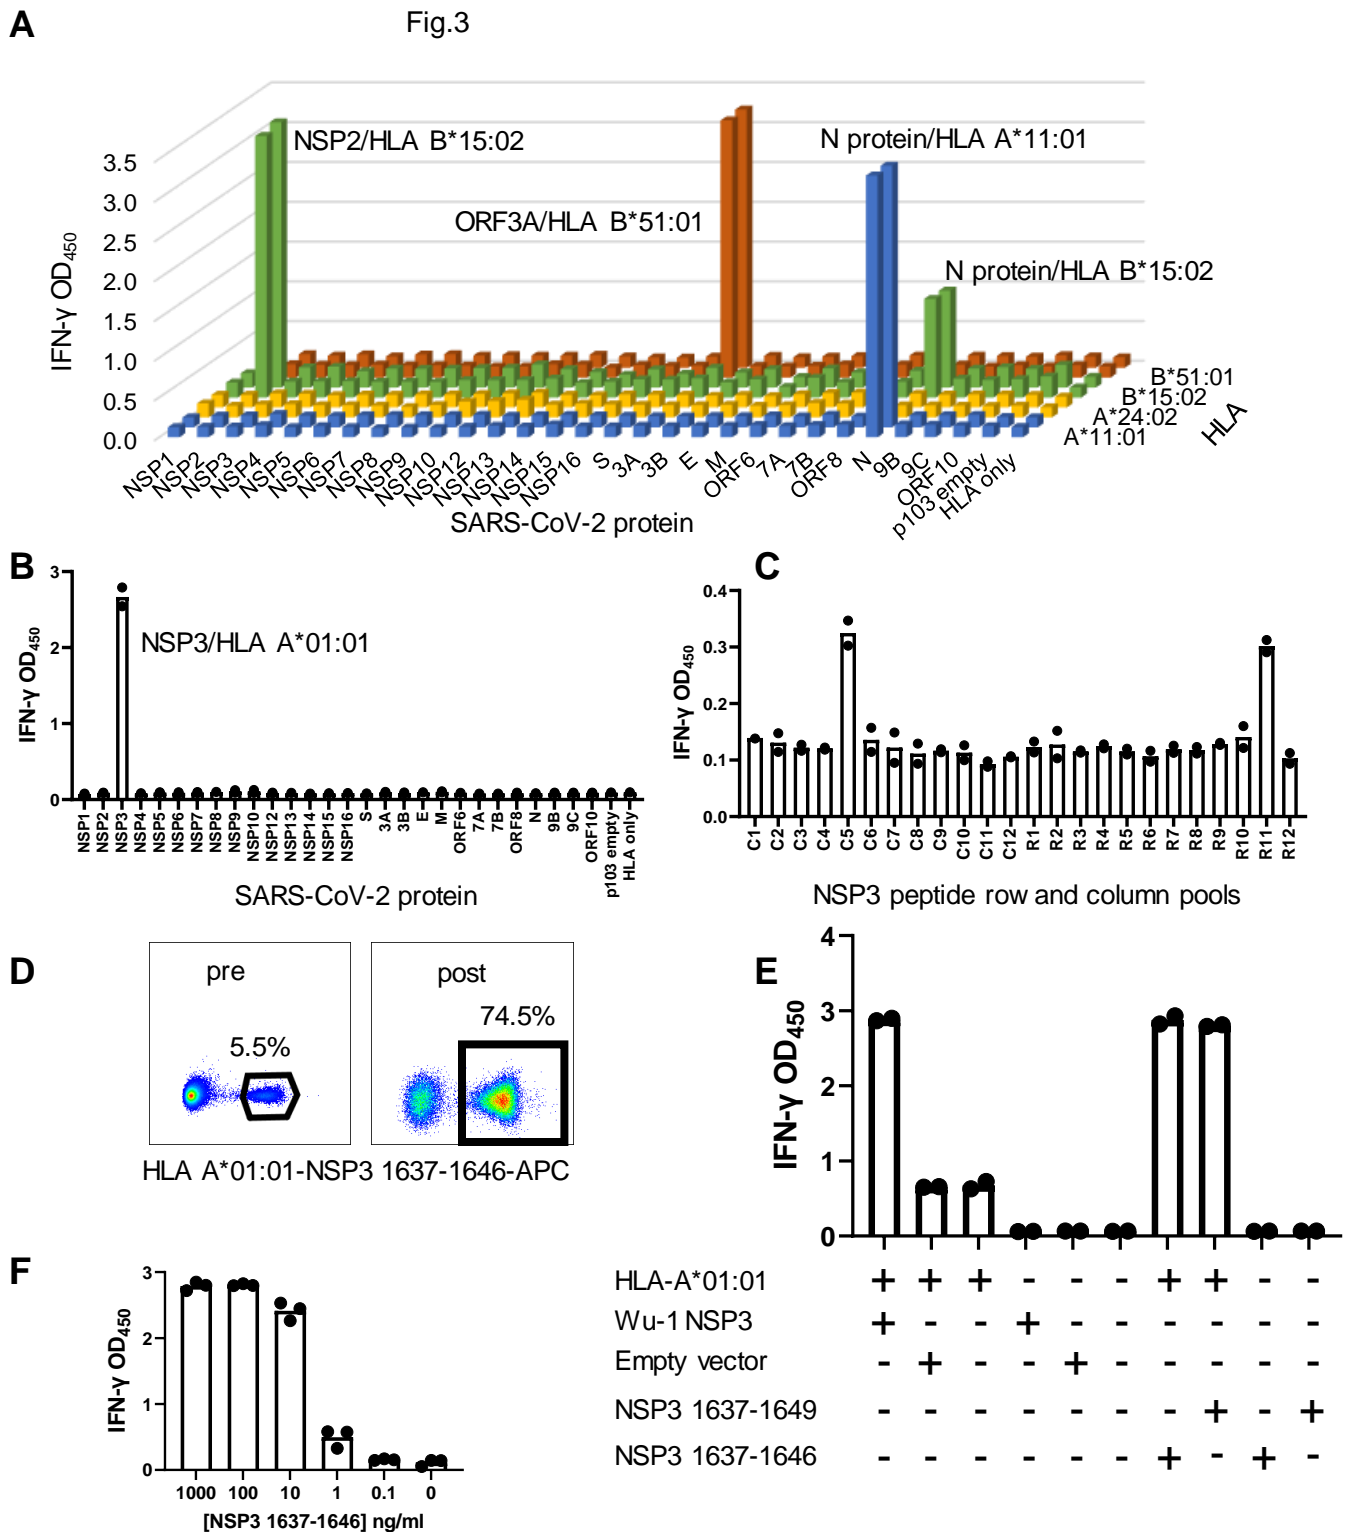

Fig. 3. SARS-CoV-2 CD8 T cell antigens and epitopes from PBMC stimulation with whole SARS-CoV-2 antigen. A: Subject W005, specimen 1 CD8 TCL were assayed with aAPC expressing each SARS-CoV-2 protein and relevant HLA A and B. Four reactivities were noted. B: Subject W010 CD8 TCL is reactive with HLA A\*01:01 aAPC co-transfected with NSP3. For A: and B: negative controls at right. C: CD8 TCL from B: assayed against column (C) and row (R) pooled NSP3 peptides with autologous EBV-LCL as APC. D: Tetramer stain of CD8 TCL before and after sorting and expansion of tetramer-positive cells. Percentages of tetramer-positive cells shown E: Reactivity of tetramer-enriched cells for aAPC transfected with the indicated plasmids or treated with the indicated peptides. F: Dose-response for HLA A\*01:01 aAPC with the indicated concentrations of NSP3 1637-1646. Duplicate or triplicate IFN- $\gamma$  release assays show raw data as bars (A) or dots for each value and means as bars (B, C, E, F).

Fig.4

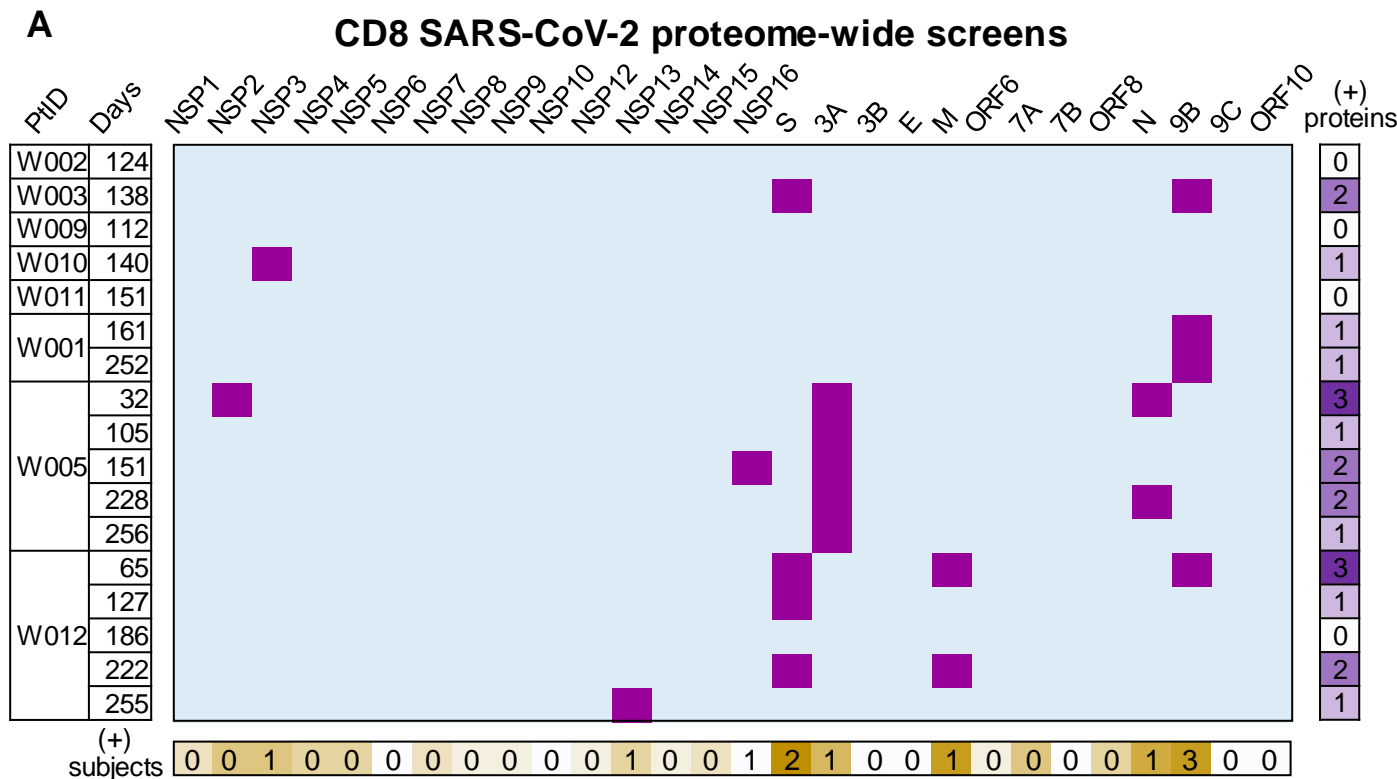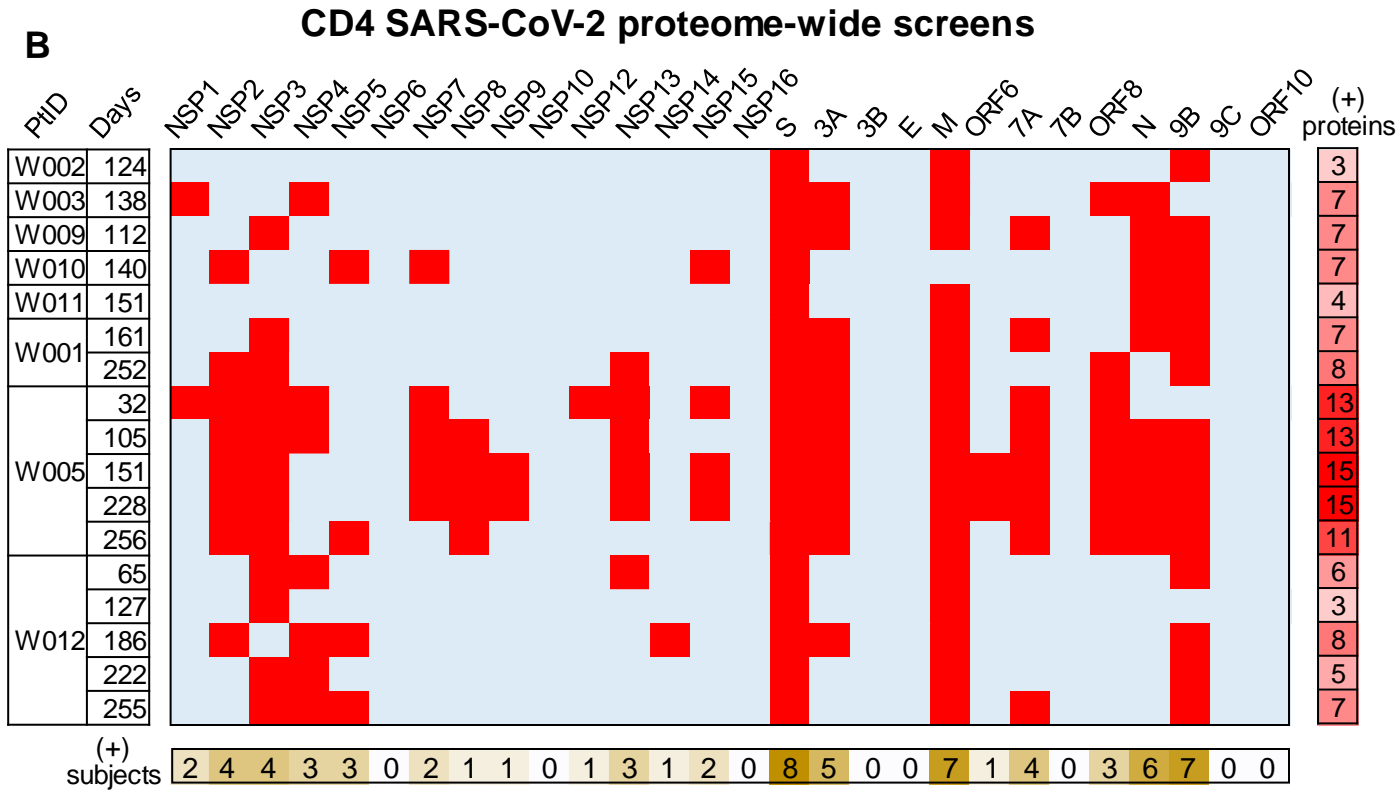

Fig. 4. Summary of SARS-CoV-2 proteome-level T cell reactivity for PBMC after COVID-19 illness, using AIM enrichment with whole viral antigen. Rows indicate donors and days between recovery from illness and PBMC sampling. Upper 5 rows were studied without DC boosting; lower 12 rows used this procedure. Columns are individual SARS-CoV-2 proteins. A: CD8 TCL scoring positive (purple). B: CD4 TCL scoring positive (red). At right are number of proteins recognized and at bottom are number of subjects with reactivity at one or more time points.



Fig.5

A

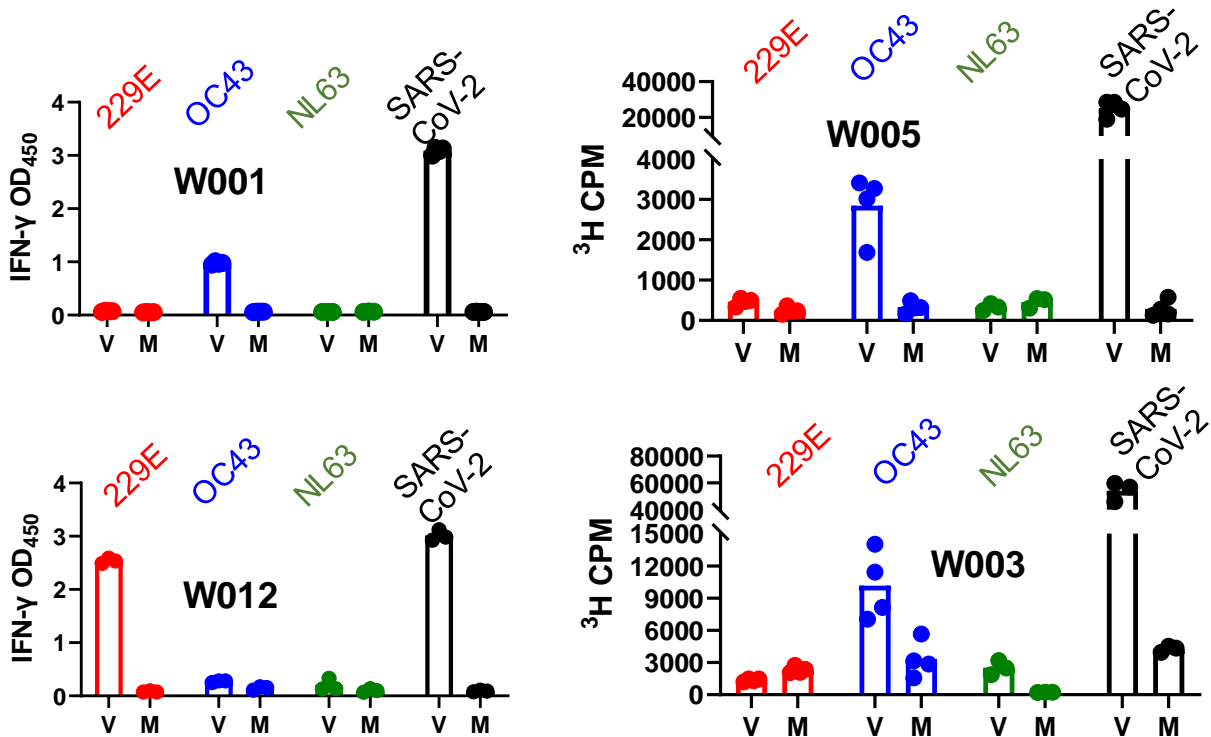

B

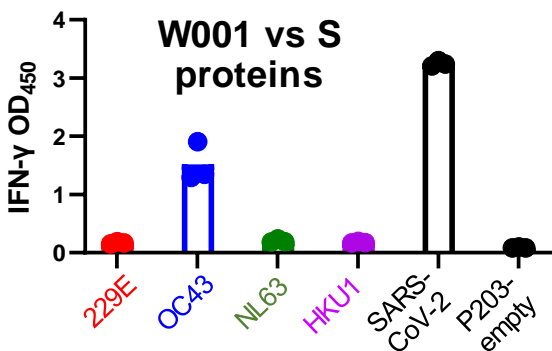

C

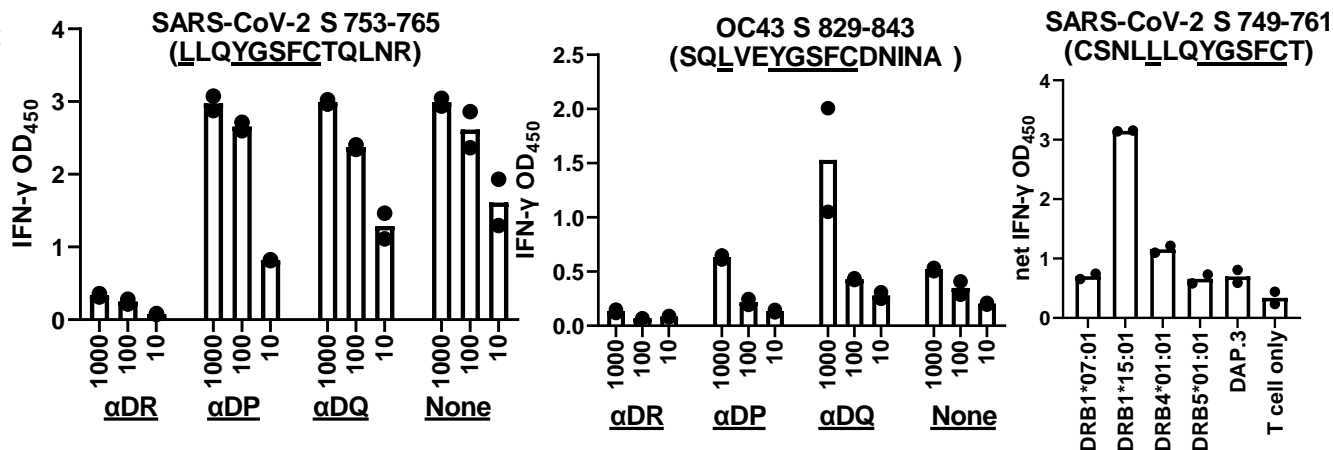

Fig. 5. A: CD4 TCL from PBMC stimulated with moDC and whole SARS-CoV-2 (subjects W001, W005, W012) or PBMC stimulated with whole SARS-CoV-2 (subject W003) recognize whole SARS-CoV-2, and sCoV OC43 or 229E antigens (V), but not mock (M) antigens. B: CD4 TCL from subject W001 recognizes full-length S protein from OC43 but not empty vector control. C: CD4 TCL recognize homologous S peptides from SARS-CoV-2 and OC43 in an HLA DR-restricted fashion as indicated by inhibition with locus-specific mAb. An overlapping SARS-CoV-2 peptide shows DRB1\*15:01 restriction at right. Conserved AA are underlined.



Fig.6

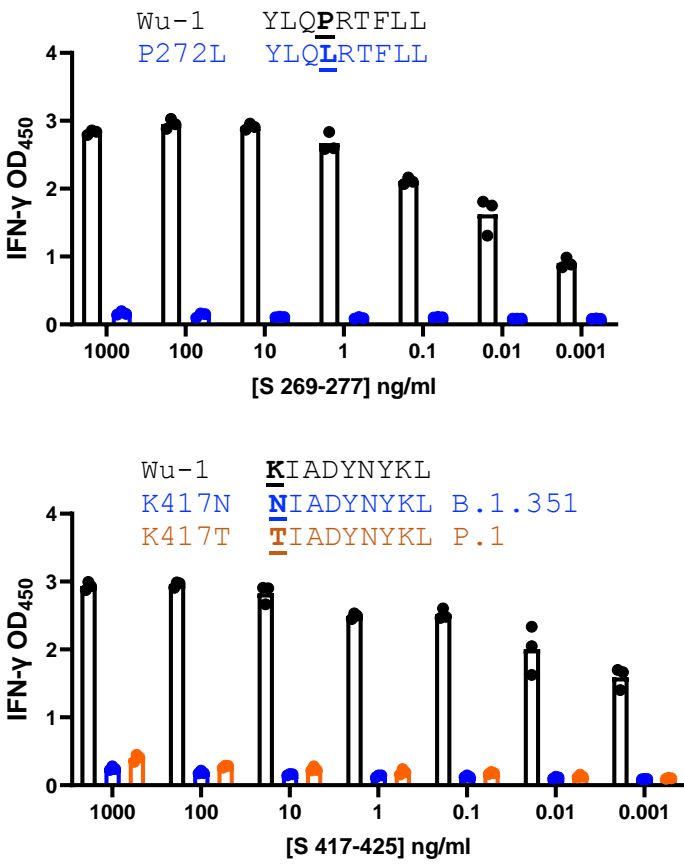

Fig. 6. CD8 TCL recognition by SARS-CoV-2 variant peptides. aAPC transfected with HLA A\*02:01 and treated with wild-type but not variant peptides were recognized by polyclonal CD8 TCL lines. Lineage B.1.351 is also known as beta and P.1 is also known as gamma).

Fig. 7

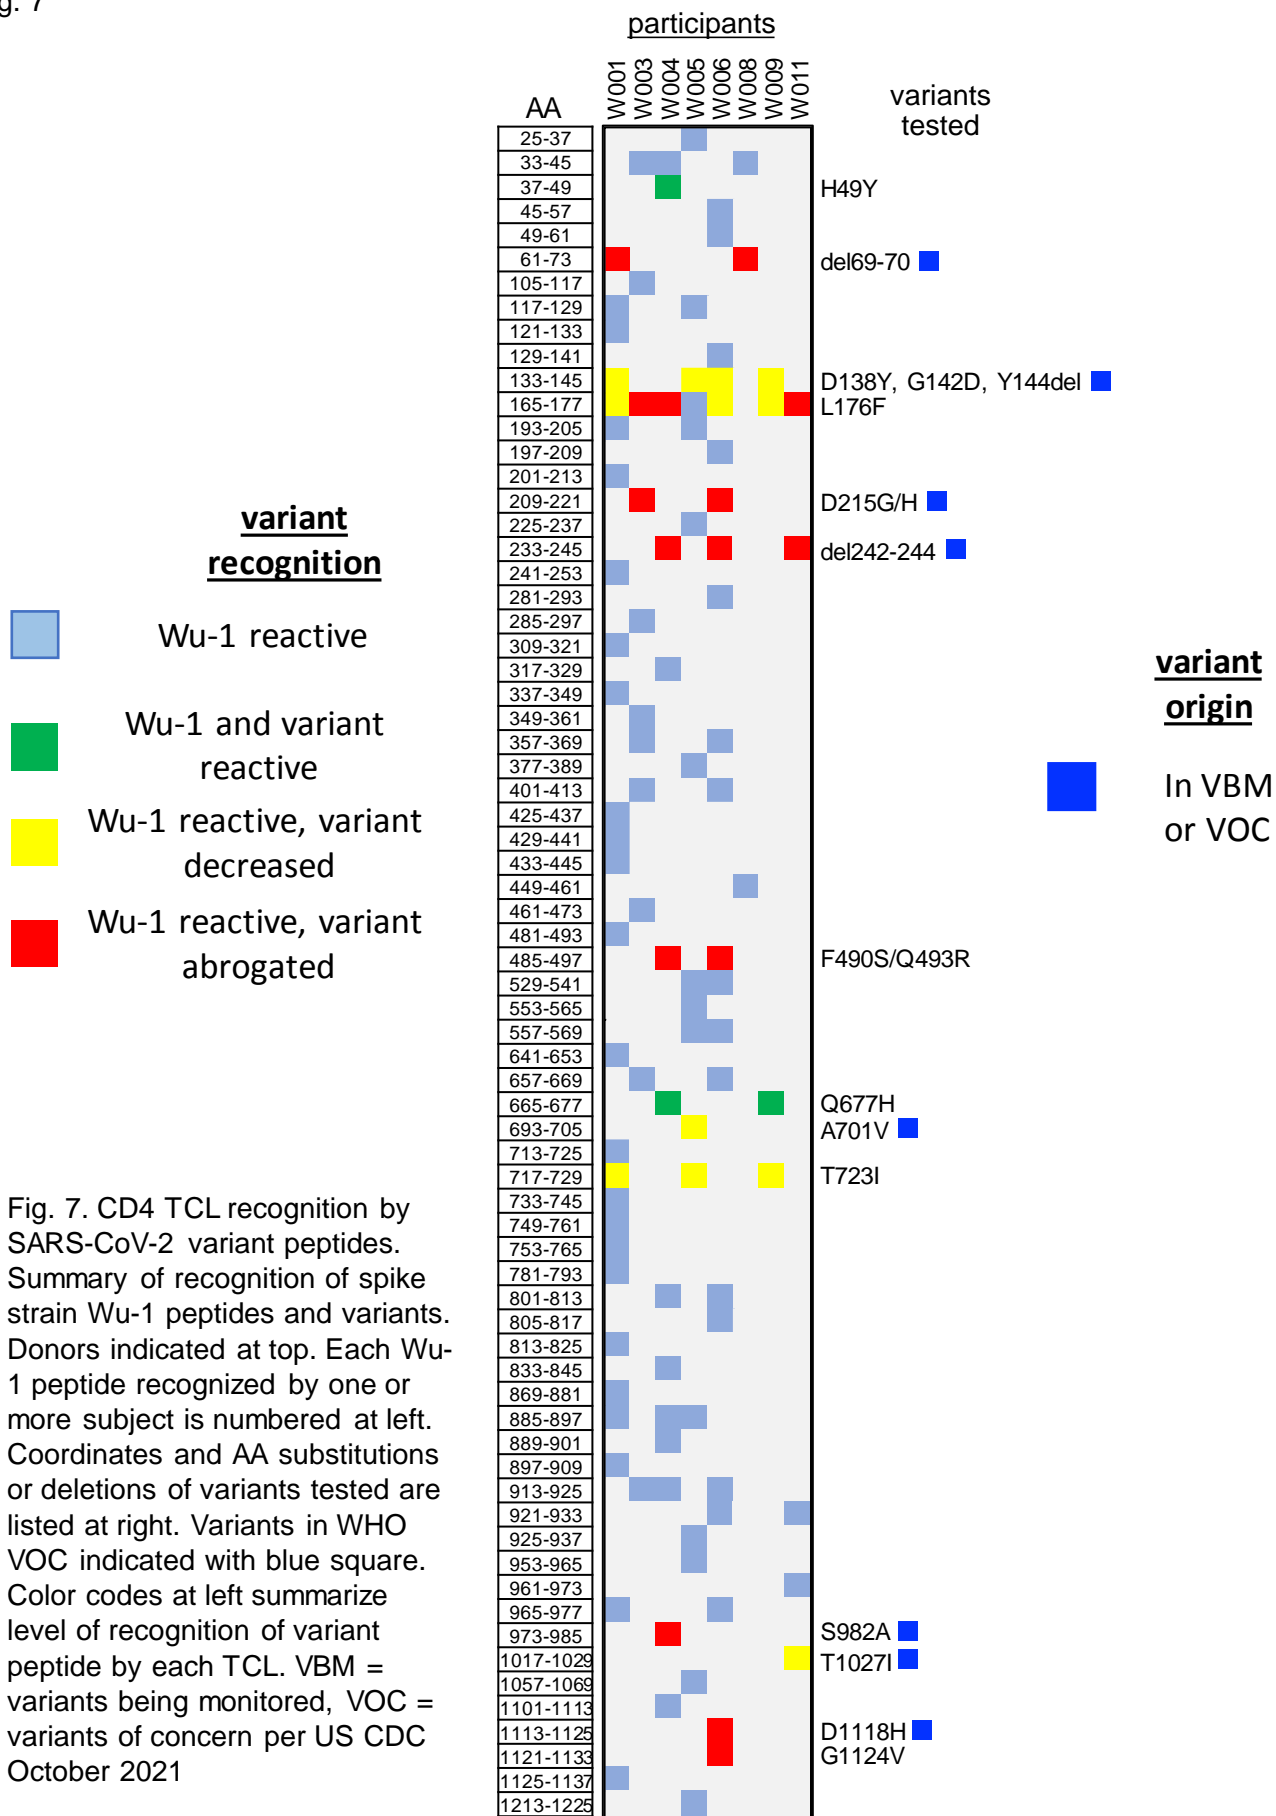

Fig. 7. CD4 T cell recognition by SARS-CoV-2 variant peptides. Summary of recognition of spike strain Wu-1 peptides and variants. Donors indicated at top. Each Wu-1 peptide recognized by one or more subject is numbered at left. Coordinates and AA substitutions or deletions of variants tested are listed at right. Variants in WHO VOC indicated with blue square. Color codes at left summarize level of recognition of variant peptide by each T cell. VBM = variants being monitored, VOC = variants of concern per US CDC October 2021
